# Supplementary material
Source: publisher figshare collection journal article supplement (https://acs.figshare.com/ndownloader/files/16437800)
Supplement: Supplementary file 1 [file 16437800]

## SUPPORTING INFORMATION

### **Generation of Indoles with Agrochemical Significance through Biotransformation by *Chaetomium globosum***

Wei Yan,<sup>†</sup> Shuang Shuang Zhao,<sup>†</sup> Yong Hao Ye,<sup>†</sup> Yang Yang Zhang,<sup>†</sup>  
Yue Zhang,<sup>†</sup> Jia Yun Xu,<sup>†</sup> Sheng Mei Yin,<sup>†</sup> and Ren Xiang Tan<sup>\*,‡</sup>

<sup>†</sup> College of Plant Protection, State & Local Joint Engineering Research  
Center of Green Pesticide Invention and Application, Nanjing  
Agricultural University, Nanjing 210095, People's Republic of China

<sup>‡</sup> State Key Laboratory Cultivation Base for TCM Quality and Efficacy,  
Nanjing University of Chinese Medicine, Nanjing 210023, People's  
Republic of China

## Table of Content

**Figure S1.** Structures of compounds **1-8**

**Figure S2.** HPLC profiles of crude extracts of fermentation broths from *Chaetomium globosum* 1C51 with (**b**) and without (**a**) 1-methyl-L-tryptophan

**Table S1.** NMR Spectroscopic Data of **5** in CDCl<sub>3</sub>

**Table S2.** NMR Spectroscopic Data of **6a** in acetone-*d*<sub>6</sub>

**Table S3.** Antibacterial activities against four phytopathogens.

**Figure S3.** <sup>1</sup>H NMR spectrum (600 MHz) of **1** in acetone-*d*<sub>6</sub>

**Figure S4.** <sup>13</sup>C NMR spectrum (150 MHz) of **1** in acetone-*d*<sub>6</sub>

**Figure S5.** <sup>1</sup>H-<sup>1</sup>H COSY spectrum of **1** in acetone-*d*<sub>6</sub>

**Figure S6.** HSQC spectrum of **1** in acetone-*d*<sub>6</sub>

**Figure S7.** HMBC spectrum of **1** in acetone-*d*<sub>6</sub>

**Figure S8.** NOESY spectrum of **1** in acetone-*d*<sub>6</sub>

**Figure S9.** <sup>1</sup>H NMR spectrum (400 MHz) of **2** in CDCl<sub>3</sub>

**Figure S10.** <sup>13</sup>C NMR spectrum (100 MHz) of **2** in CDCl<sub>3</sub>

**Figure S11.** <sup>1</sup>H-<sup>1</sup>H COSY spectrum of **2** in CDCl<sub>3</sub>

**Figure S12.** HSQC spectrum of **2** in CDCl<sub>3</sub>

**Figure S13.** HMBC spectrum of **2** in CDCl<sub>3</sub>

**Figure S14.** NOESY spectrum of **2** in CDCl<sub>3</sub>

**Figure S15.** <sup>1</sup>H NMR spectrum (400 MHz) of **3** in CDCl<sub>3</sub>

**Figure S16.** <sup>13</sup>C NMR spectrum (100 MHz) of **3** in CDCl<sub>3</sub>

**Figure S17.** <sup>1</sup>H-<sup>1</sup>H COSY spectrum of **3** in CDCl<sub>3</sub>

**Figure S18.** HSQC spectrum of **3** in CDCl<sub>3</sub>

**Figure S19.** HMBC spectrum of **3** in CDCl<sub>3</sub>

**Figure S20.** NOESY spectrum of **3** in CDCl<sub>3</sub>

**Figure S21.** <sup>1</sup>H NMR spectrum (600 MHz) of **4** in CDCl<sub>3</sub>

**Figure S22.** <sup>13</sup>C-NMR spectrum (150 MHz) of **4** in CDCl<sub>3</sub>

**Figure S23.** <sup>1</sup>H-<sup>1</sup>H COSY spectrum of **4** in CDCl<sub>3</sub>

**Figure S24.** HSQC spectrum of **4** in CDCl<sub>3</sub>

**Figure S25.** HMBC spectrum of **4** in CDCl<sub>3</sub>

**Figure S26.** NOESY spectrum of **4** in CDCl<sub>3</sub>

**Figure S27.** <sup>1</sup>H NMR spectrum (600 MHz) of **5** in acetone-*d*<sub>6</sub>

**Figure S28.** <sup>13</sup>C NMR spectrum (150 MHz) of **5** in acetone-*d*<sub>6</sub>

**Figure S29.** <sup>1</sup>H-<sup>1</sup>H COSY spectrum of **5** in acetone-*d*<sub>6</sub>

**Figure S30.** HSQC spectrum of **5** in acetone-*d*<sub>6</sub>

**Figure S31.** HMBC spectrum of **5** in acetone-*d*<sub>6</sub>

**Figure S32.** NOESY spectrum of **5** in acetone-*d*<sub>6</sub>

**Figure S33.** <sup>1</sup>H NMR spectrum (400 MHz) of **6a** in acetone-*d*<sub>6</sub>

**Figure S34.** <sup>13</sup>C NMR spectrum (100 MHz) of **6a** in acetone-*d*<sub>6</sub>

**Figure S35.** HSQC spectrum of **6a** in acetone-*d*<sub>6</sub>

**Figure S36.** HMBC spectrum of **6a** in acetone-*d*<sub>6</sub>

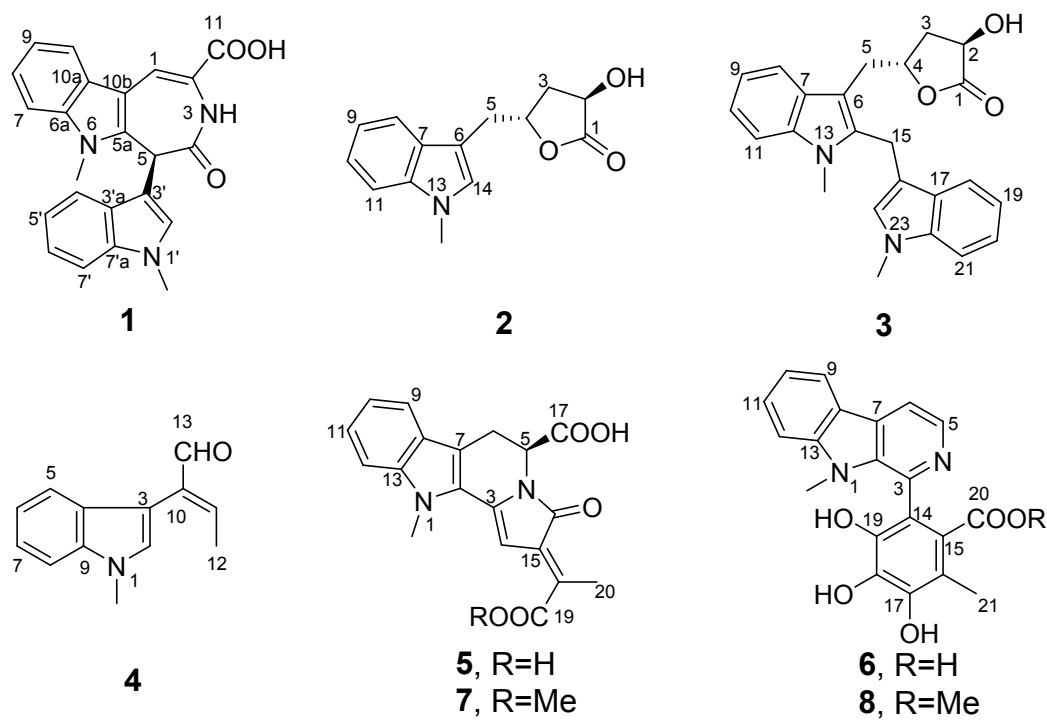

**Figure S1.** Structures of compounds **1-8**.

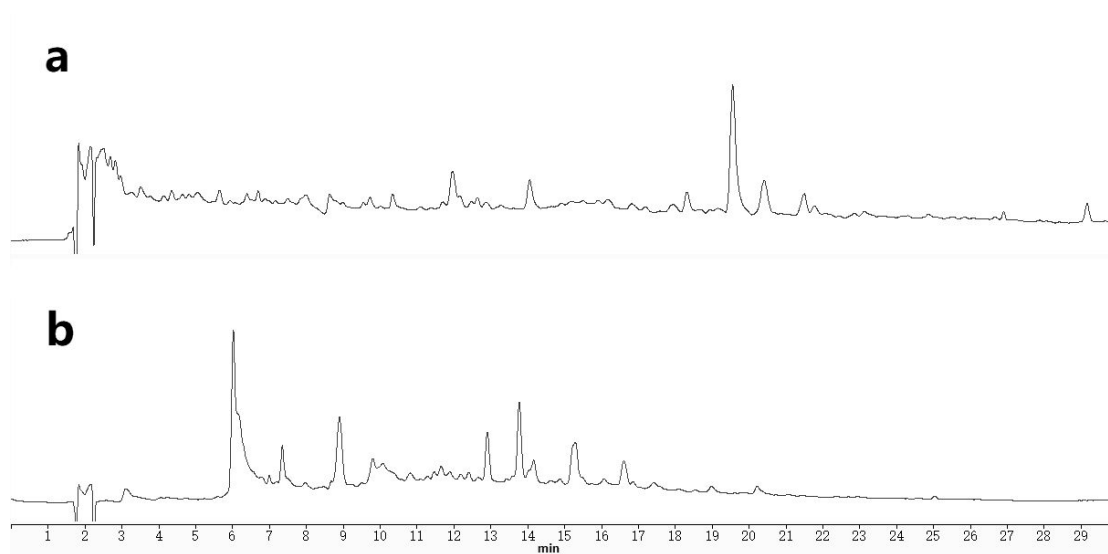

**Figure S2.** HPLC profiles of crude extracts of fermentation broths from *Chaetomium globosum* 1C51 with **(b)** and without **(a)** supplement of 1-methyl-L-tryptophan. Changes in the HPLC figures indicated the production of new secondary metabolites.

**Table S1.** NMR Spectroscopic Data of **5** in CDCl<sub>3</sub>

| position | $\delta_C$ | $\delta_H$ (mult. $J$ in Hz)           |
|----------|------------|----------------------------------------|
| 2        | 126.7      |                                        |
| 3        | 136.0      |                                        |
| 5        | 50.4       | 5.20 (d, 7.1)                          |
| 6        | 24.3       | 3.78 (d, 16.6)<br>3.40 (dd, 7.1, 16.6) |
| 7        | 113.8      |                                        |
| 8        | 126.2      |                                        |
| 9        | 120.4      | 7.67 (d, 8.0)                          |
| 10       | 125.4      | 7.14 (t, 8.0 )                         |
| 11       | 120.9      | 7.32 (t, 8.0)                          |
| 12       | 110.6      | 7.50 (d, 8.0)                          |
| 13       | 140.9      |                                        |
| 14       | 98.7       | 7.04 (s)                               |
| 15       | 136.9      |                                        |
| 16       | 169.5      |                                        |
| 17       | 171.7      |                                        |
| 18       | 132.6      |                                        |
| 19       | 169.2      |                                        |
| 20       | 14.9       | 2.53 (s)                               |
| 1-NMe    | 31.7       | 3.97 (s)                               |

**Table S2.** NMR Spectroscopic Data of **6a** in acetone-*d*<sub>6</sub>

| position | $\delta_{\text{C}}$ | $\delta_{\text{H}}$ (mult. <i>J</i> in Hz) |
|----------|---------------------|--------------------------------------------|
| 2        | 136.0               |                                            |
| 3        | 134.8               |                                            |
| 5        | 136.7               | 9.28 (d, 6.5)                              |
| 6        | 118.1               | 8.98 (d, 6.5)                              |
| 7        | 130.1               |                                            |
| 8        | 120.1               |                                            |
| 9        | 124.5               | 8.62 (d, 7.5)                              |
| 10       | 123.2               | 7.55 (t, 7.5)                              |
| 11       | 133.4               | 7.91 (t, 7.5)                              |
| 12       | 112.1               | 7.84 (d, 7.5)                              |
| 13       | 146.9               |                                            |
| 14       | 100.9               |                                            |
| 15       | 128.9               |                                            |
| 16       | 117.4               |                                            |
| 17       | 157.2               |                                            |
| 17-OMe   | 61.5                | 4.06 (s)                                   |
| 18       | 151.0               |                                            |
| 18-OMe   | 61.7                | 3.84 (s)                                   |
| 19       | 149.1               |                                            |
| 19-OMe   | 61.6                | 4.06 (s)                                   |
| 20       | 167.5               |                                            |
| 21       | 13.5                | 2.39 (s)                                   |
| 22       | 53.0                | 3.38 (s)                                   |
| 1-NMe    | 31.7                | 3.58 (s)                                   |
| 4-NMe    | 46.4                | 4.40 (s)                                   |

**Table S3.** Antibacterial activities against four phytopathogens. All values are expressed in MIC (µg/mL)

| Compound                             | <i>X. oryzae</i> pv.<br><i>oryzae</i> | <i>R.</i><br><i>solanacearum</i> | <i>X. oryzae</i> pv.<br><i>oryzicola</i> | <i>P. syringae</i> pv.<br><i>lachrymans</i> |
|--------------------------------------|---------------------------------------|----------------------------------|------------------------------------------|---------------------------------------------|
| <b>1</b>                             | 8                                     | 32                               | 32                                       | 128                                         |
| <b>3</b>                             | 32                                    | >128                             | >128                                     | >128                                        |
| <b>5</b>                             | 32                                    | 128                              | 64                                       | >128                                        |
| <b>6</b>                             | 64                                    | >128                             | >128                                     | >128                                        |
| streptomycin<br>sulfate <sup>a</sup> | 0.25                                  | 3.125                            | 2.5                                      | 12.5                                        |

<sup>a</sup> positive control

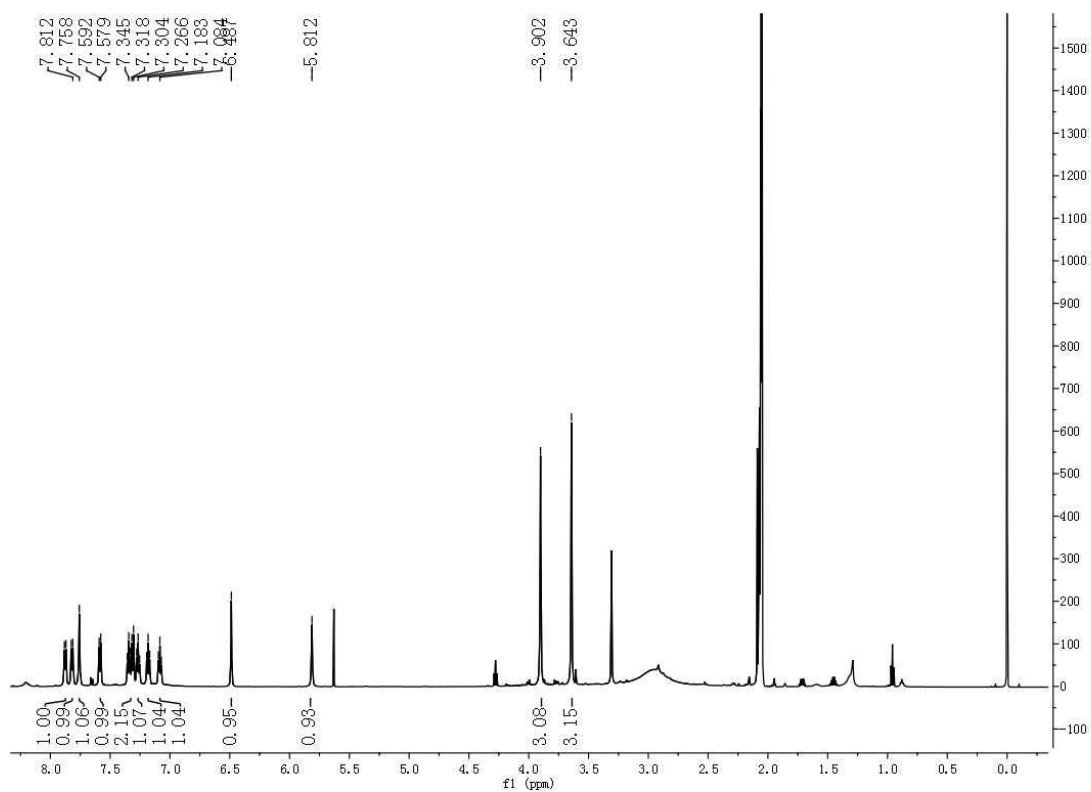

Figure S3. <sup>1</sup>H NMR spectrum of **1**

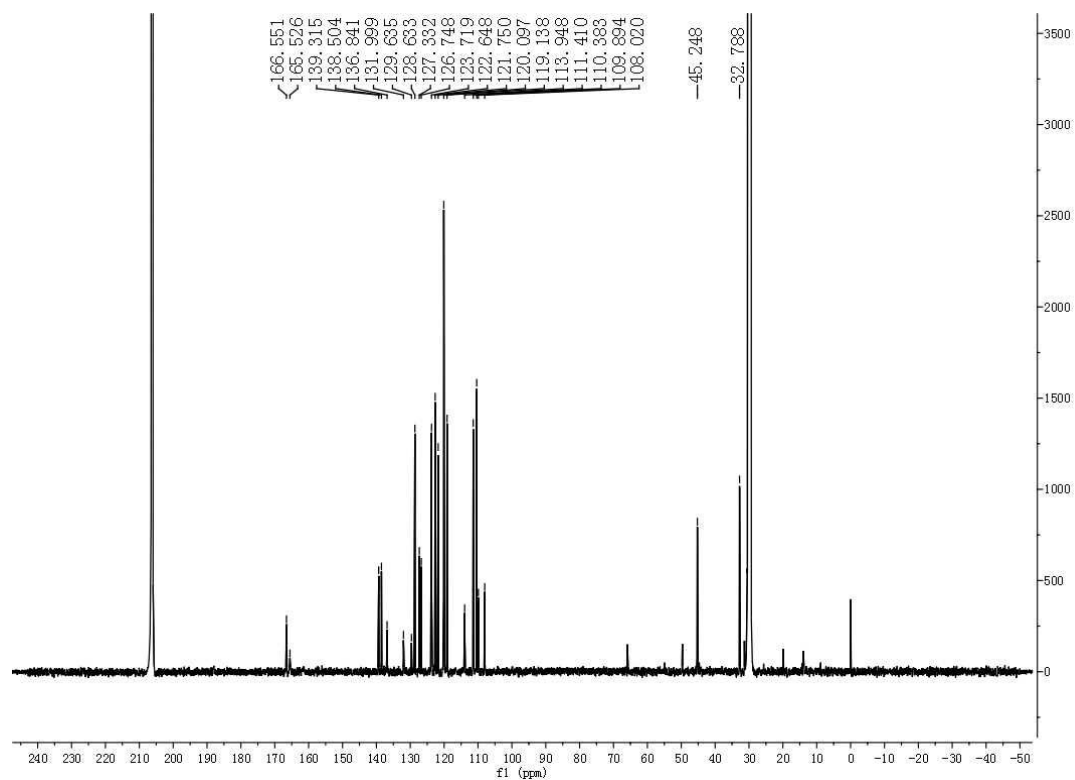

Figure S4. <sup>13</sup>C NMR spectrum of **1**

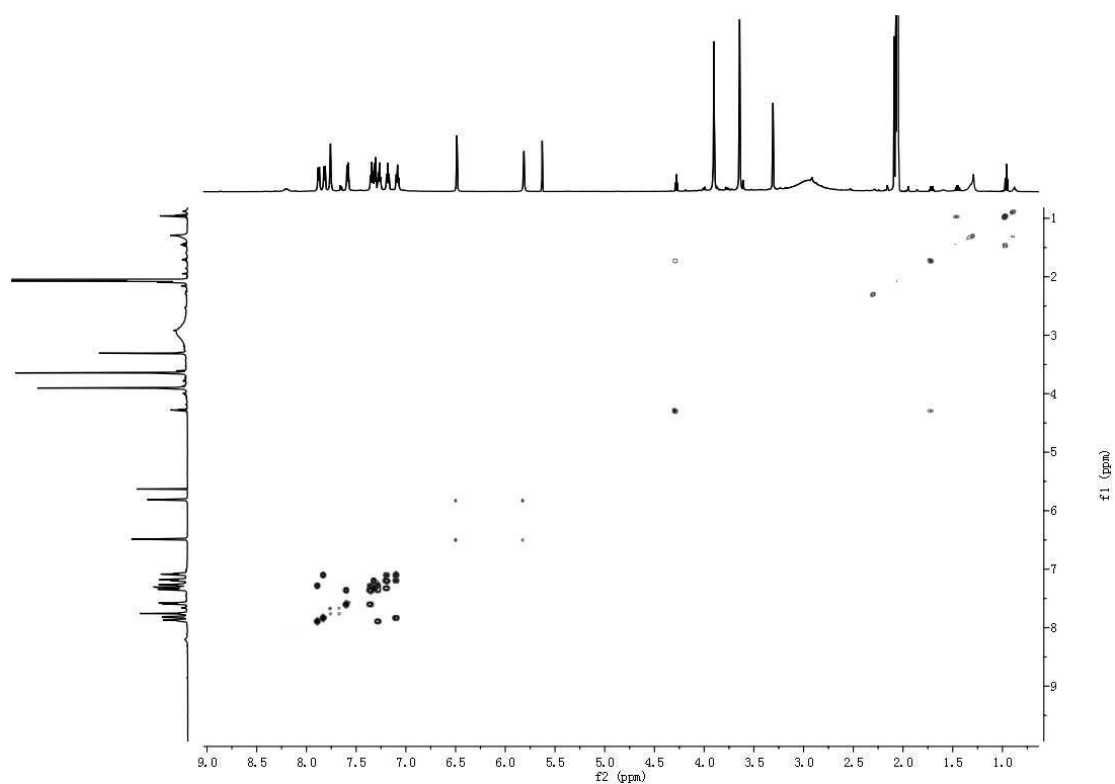

**Figure S5.**  $^1\text{H}$ – $^1\text{H}$  COSY spectrum of **1**

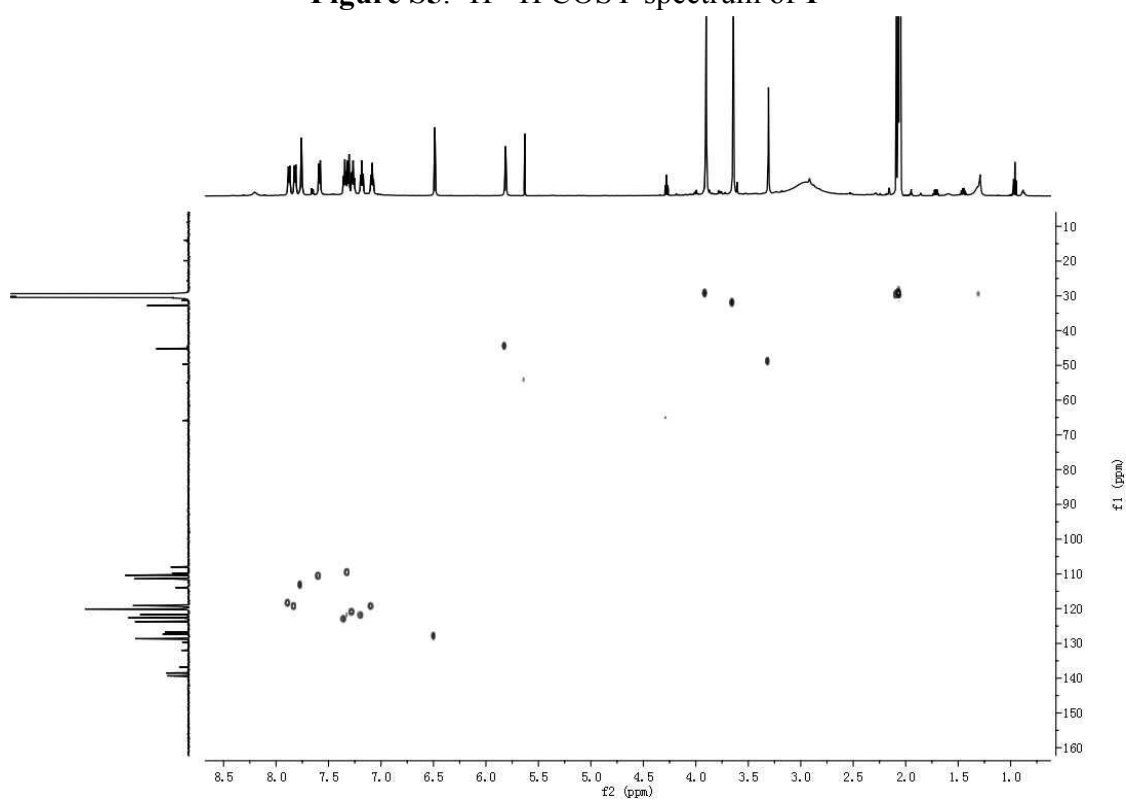

**Figure S6.** HSQC spectrum of **1**

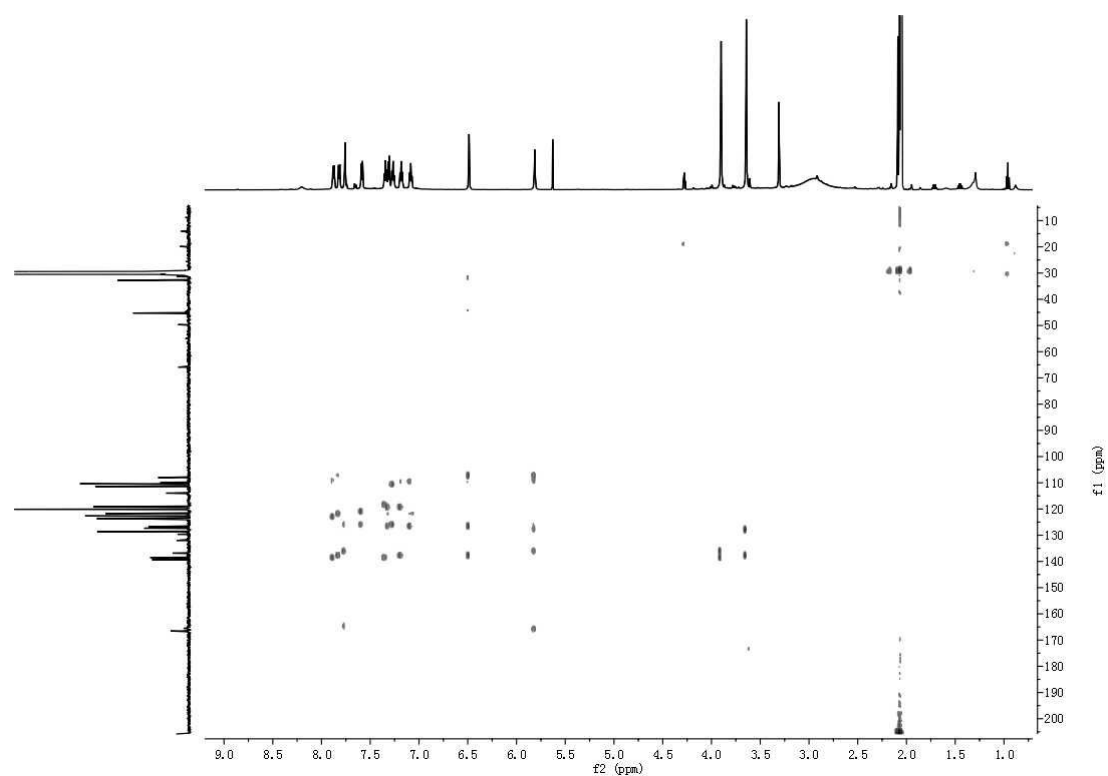

**Figure S7.** HMBC spectrum of **1**

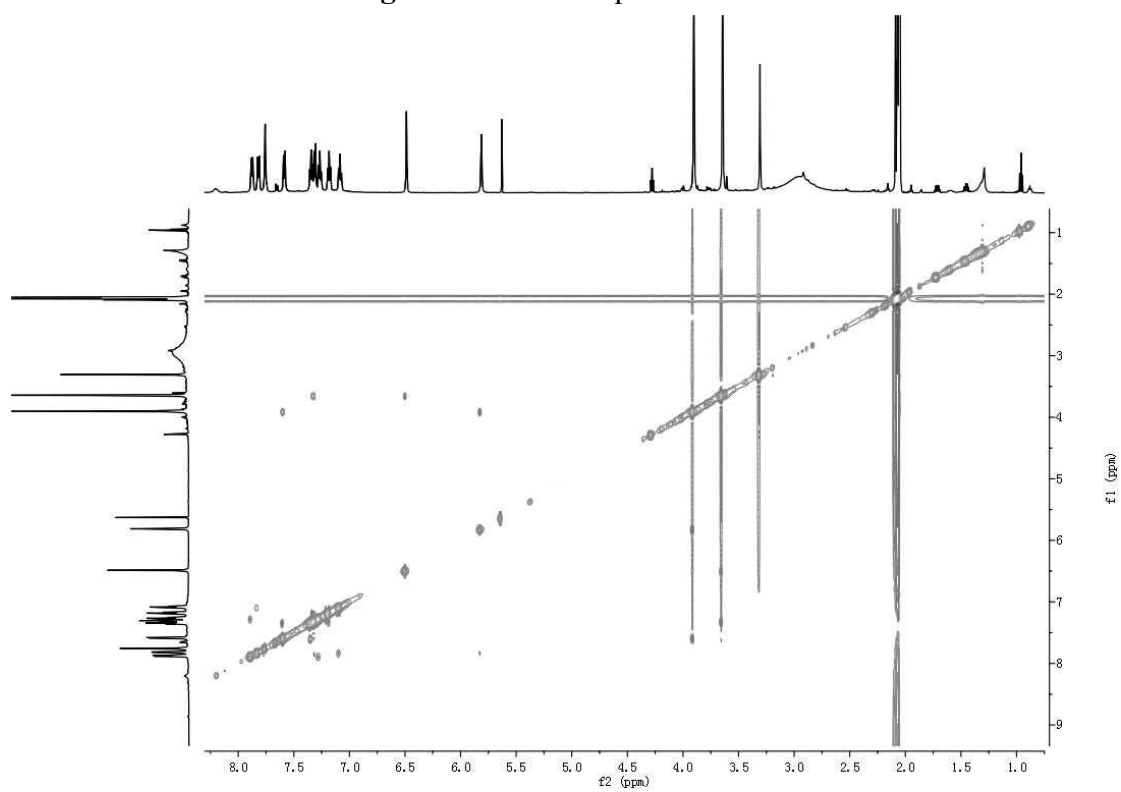

**Figure S8.** NOESY spectrum of **1**

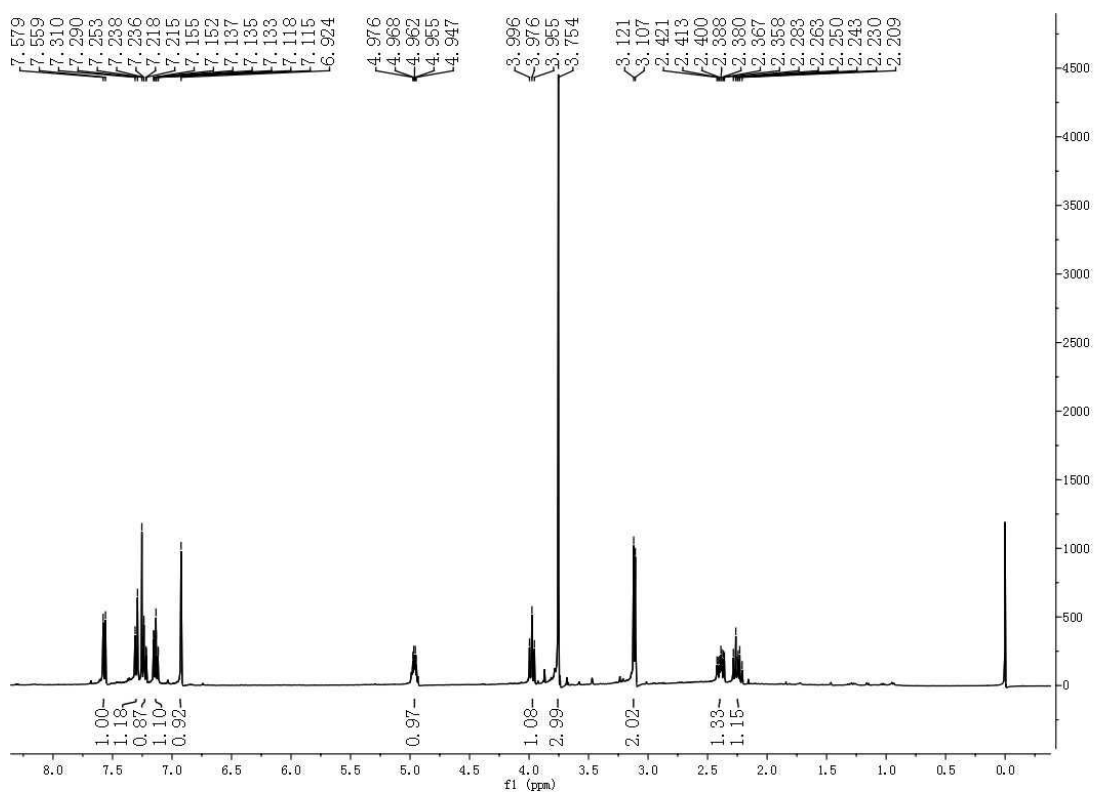

**Figure S9.  $^1\text{H}$  NMR spectrum of **2****

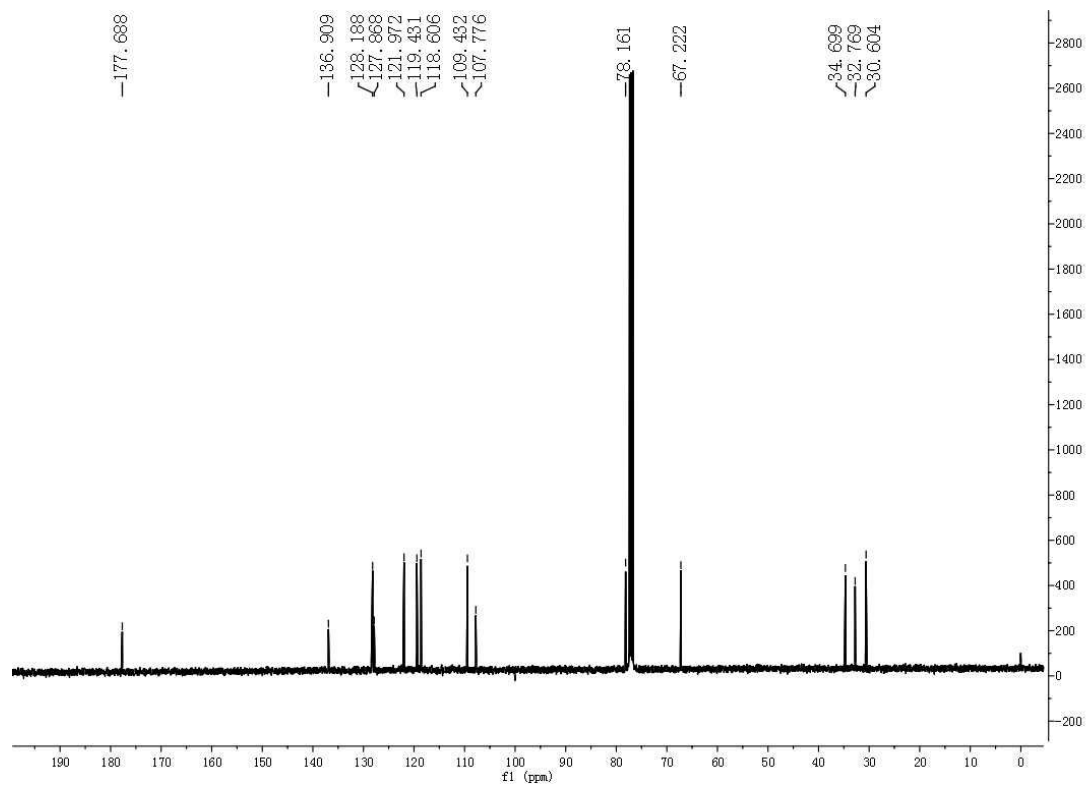

**Figure S10.  $^{13}\text{C}$  NMR spectrum of **2****

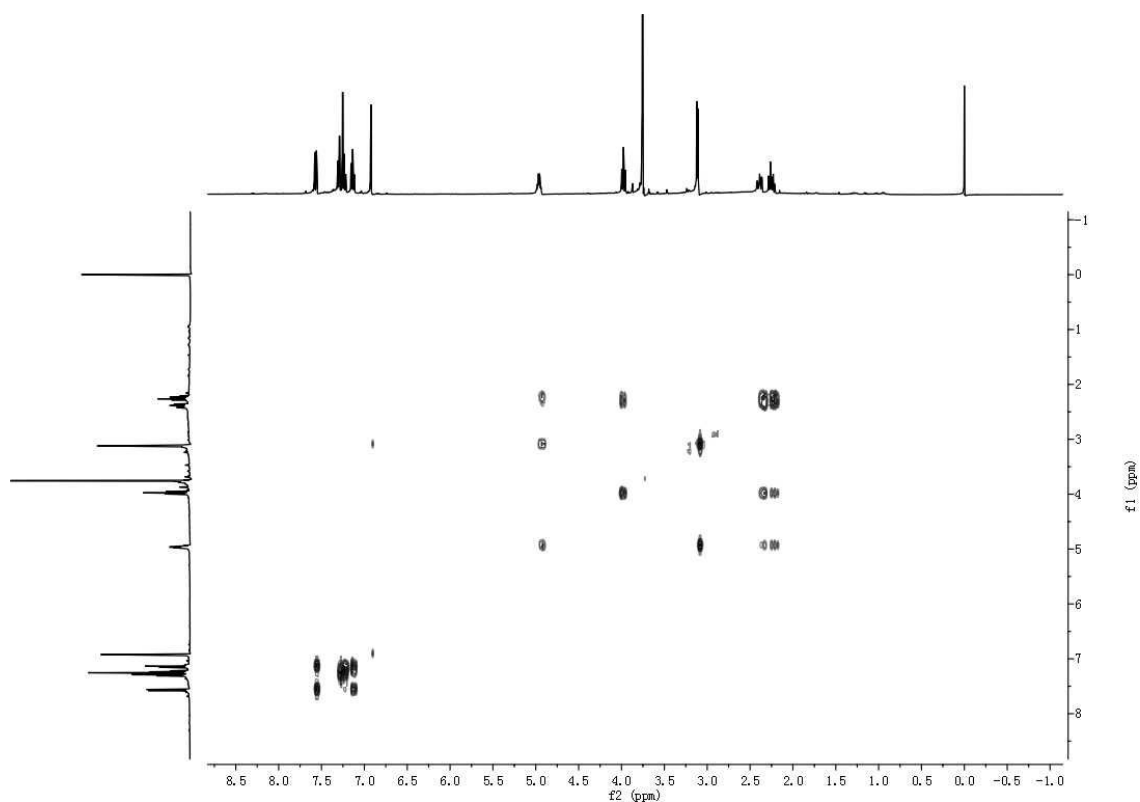

**Figure S11.**  $^1\text{H}$ - $^1\text{H}$  COSY spectrum of **2**

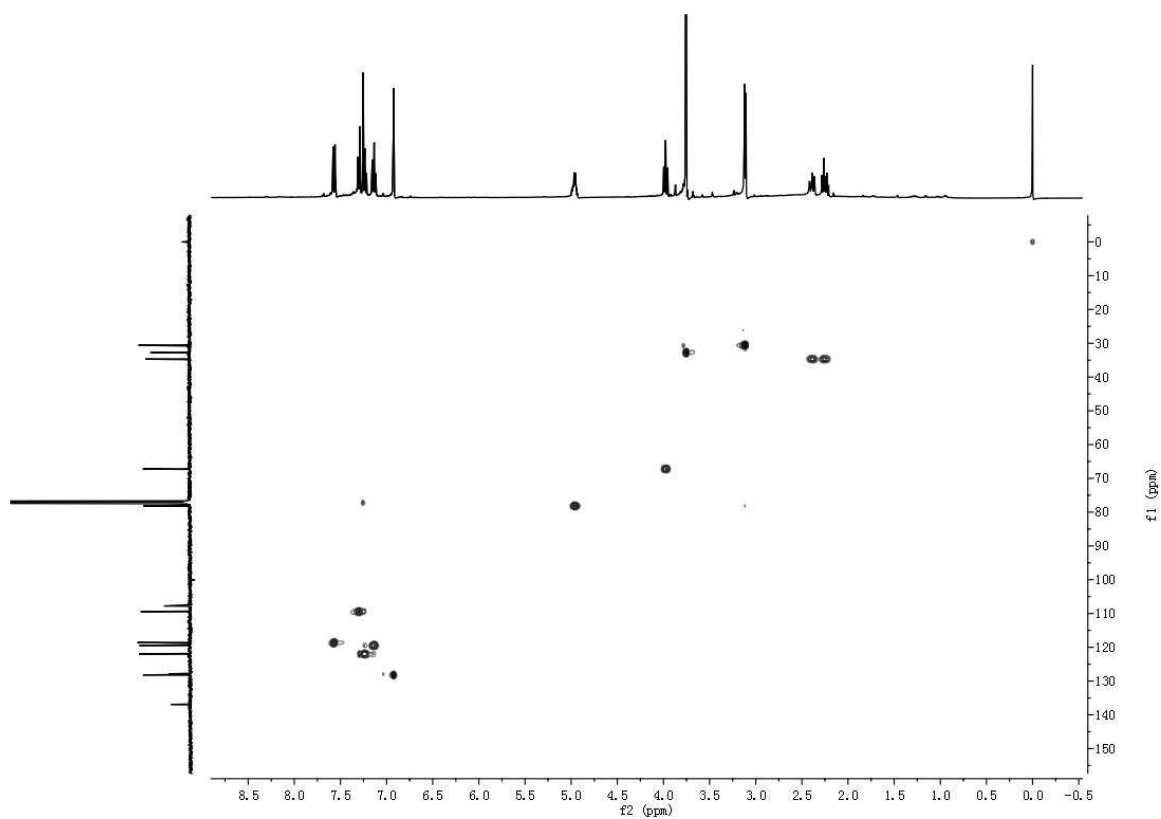

**Figure S12.** HSQC spectrum of **2**

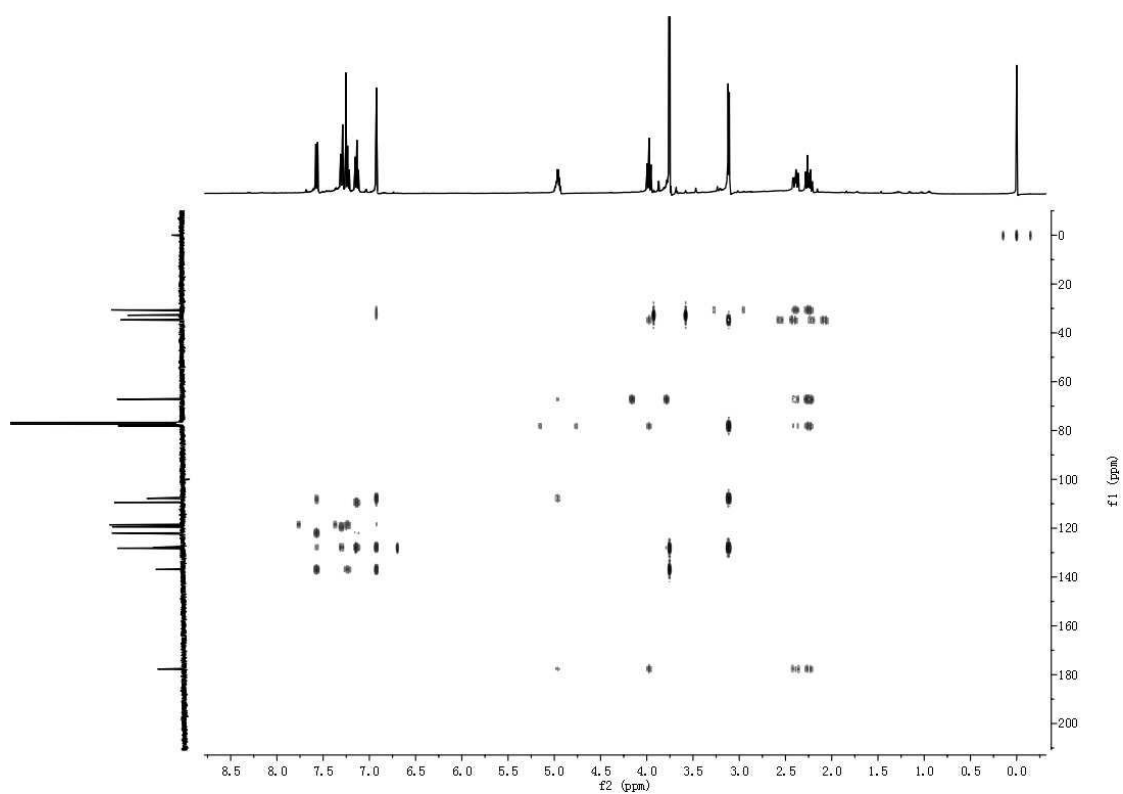

**Figure S13.** HMBC spectrum of **2**

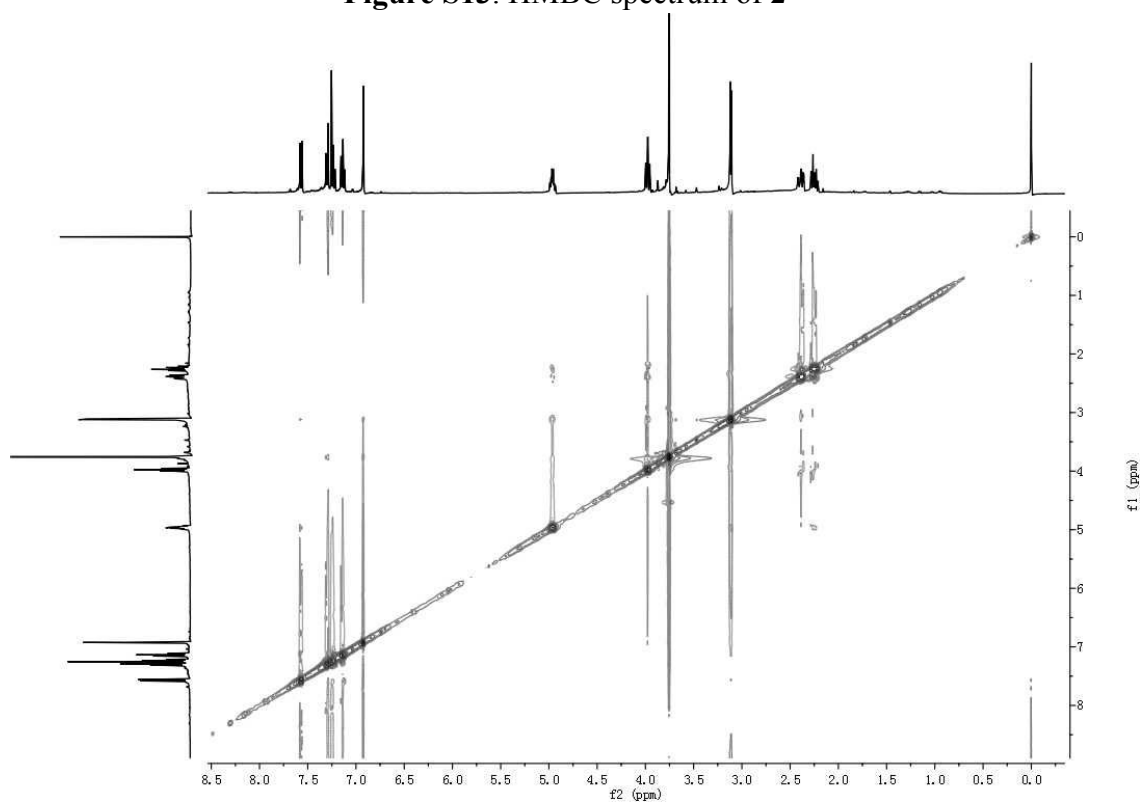

**Figure S14.** NOESY spectrum of **2**

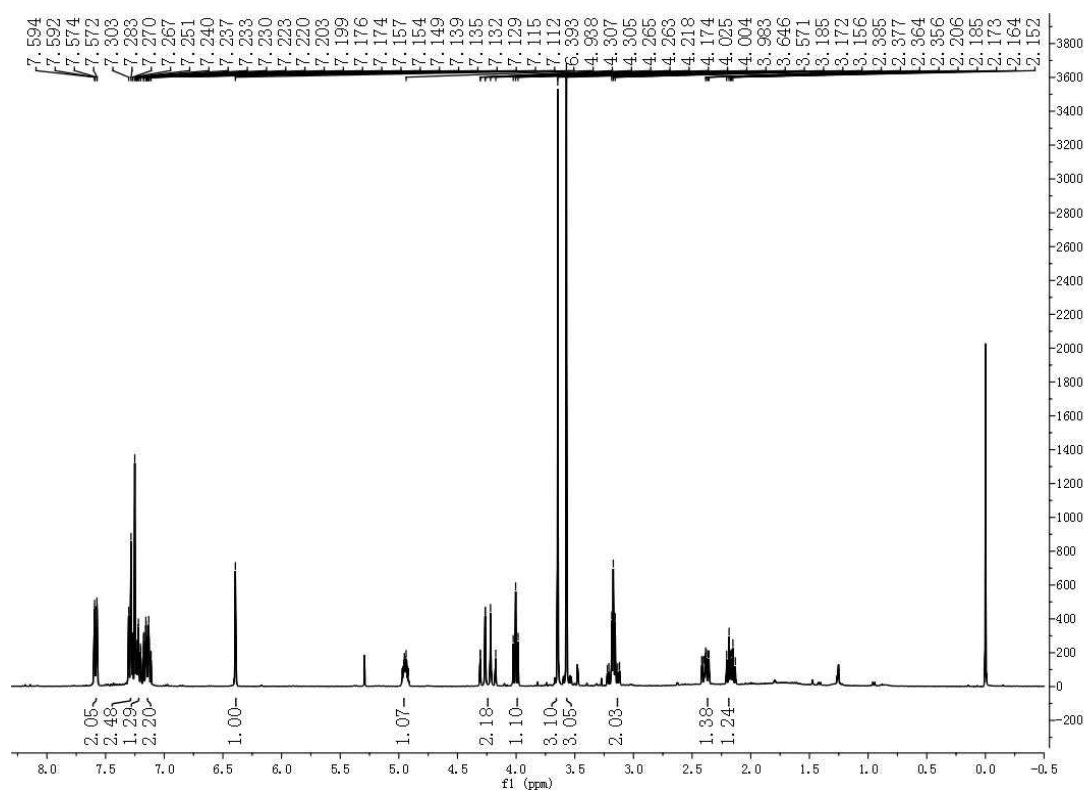

Figure S15. <sup>1</sup>H NMR spectrum of **3**

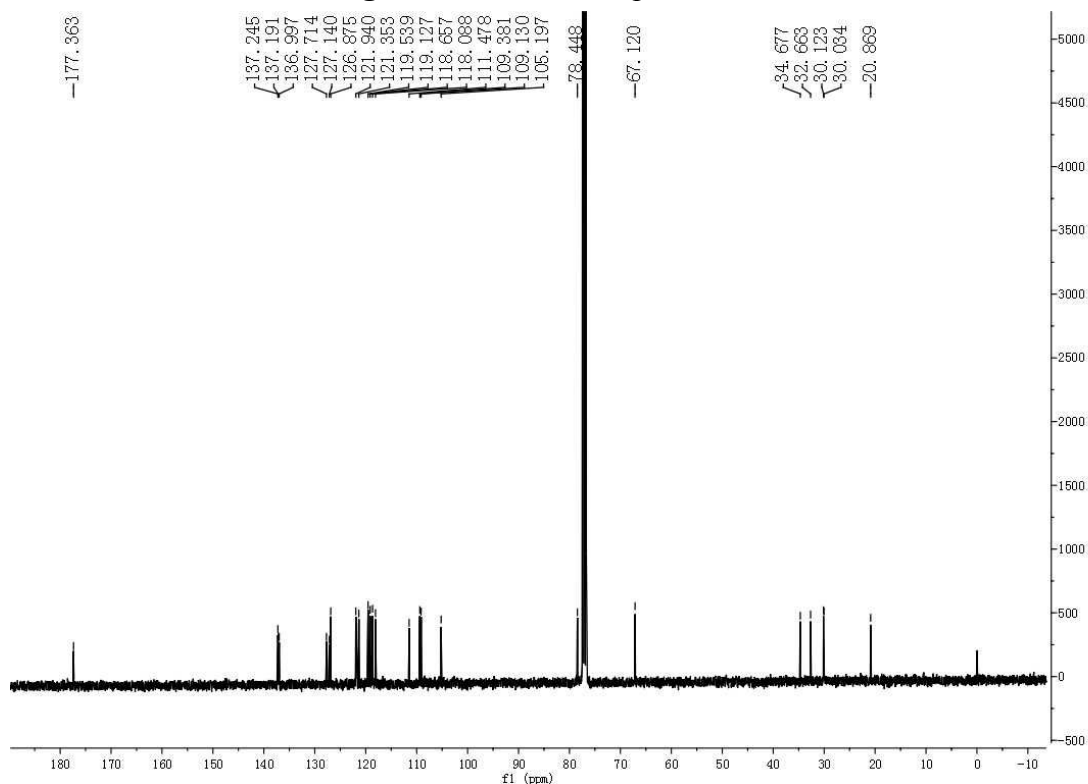

Figure S16. <sup>13</sup>C NMR spectrum **3**

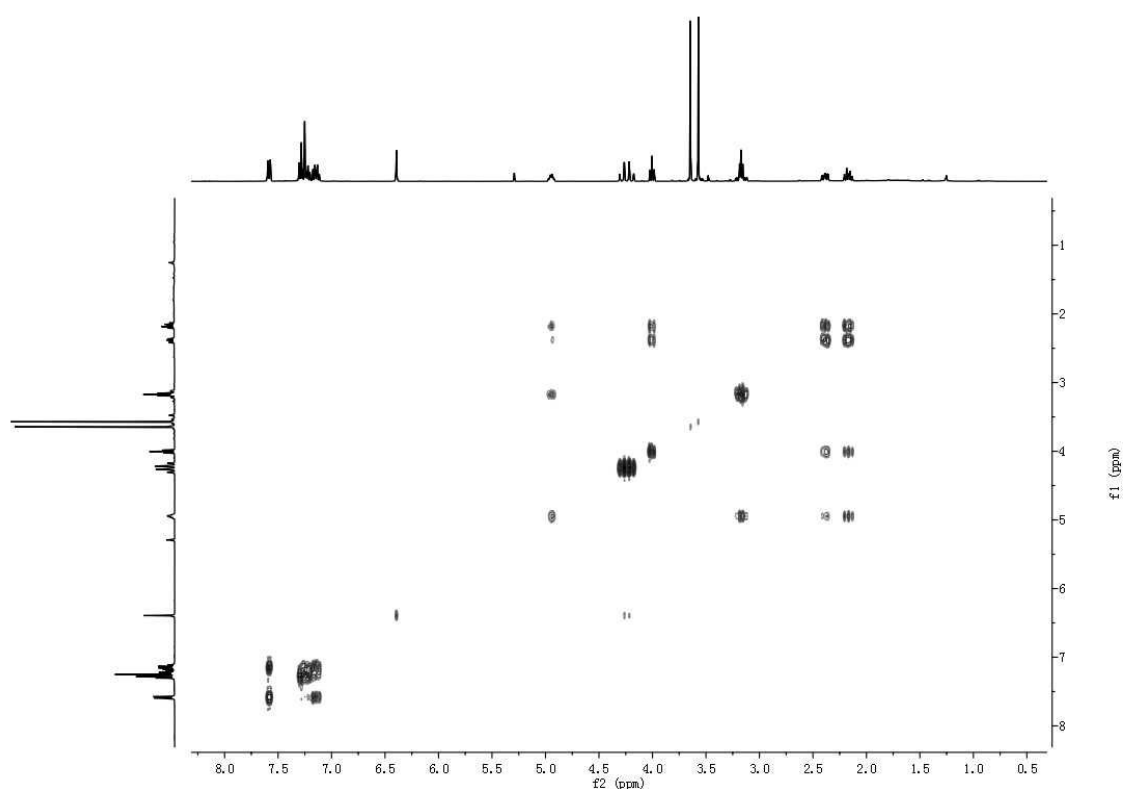

**Figure S17.**  $^1\text{H}$ - $^1\text{H}$  COSY spectrum of **3**

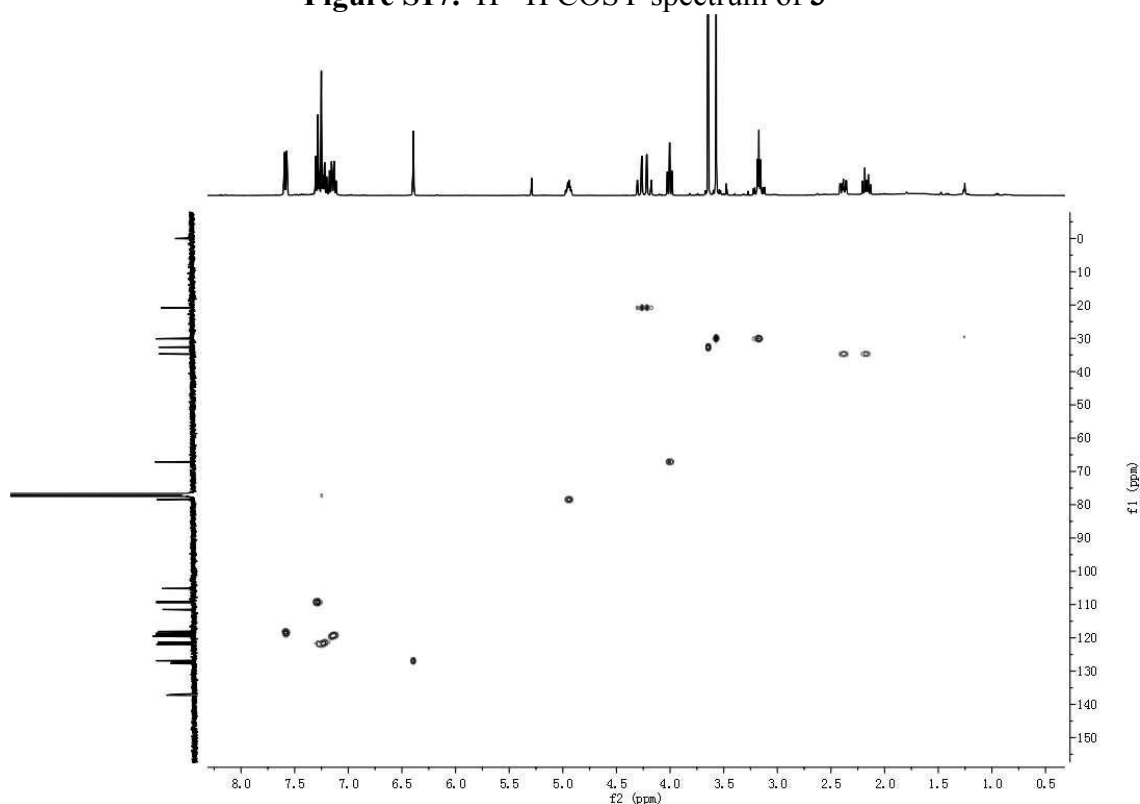

**Figure S18.** HSQC spectrum of **3**

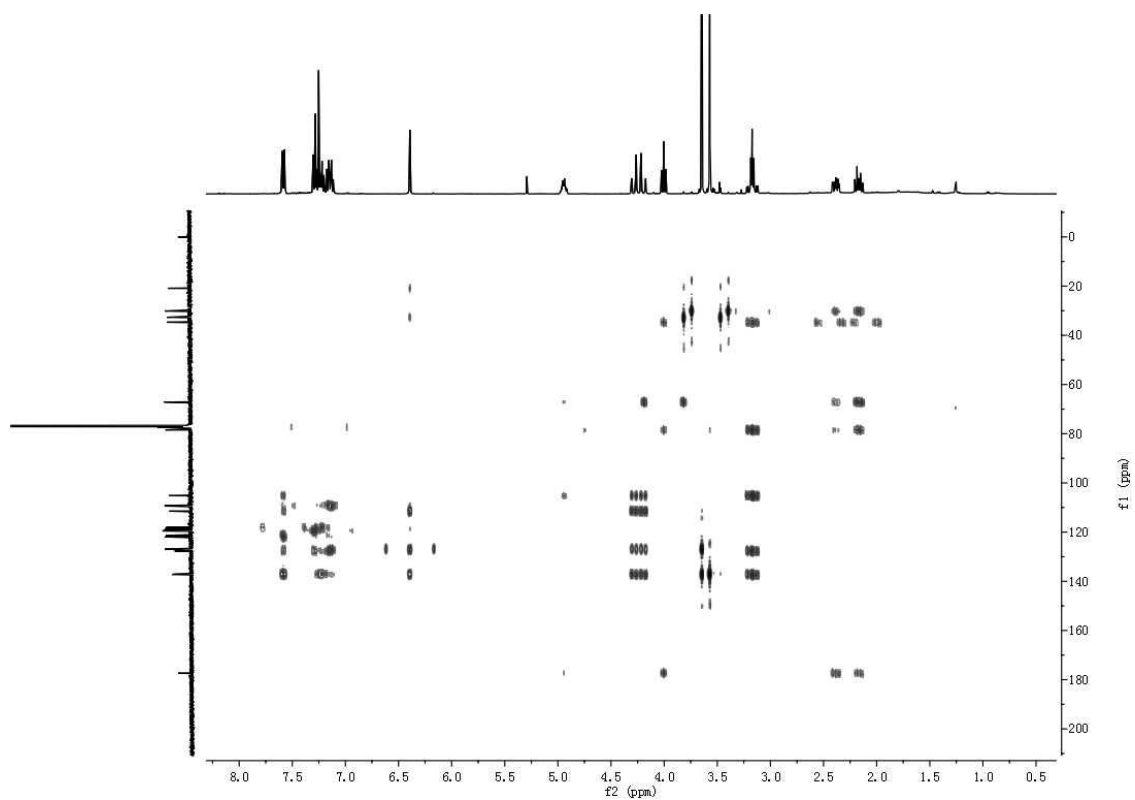

**Figure S19.** HMBC spectrum of **3**

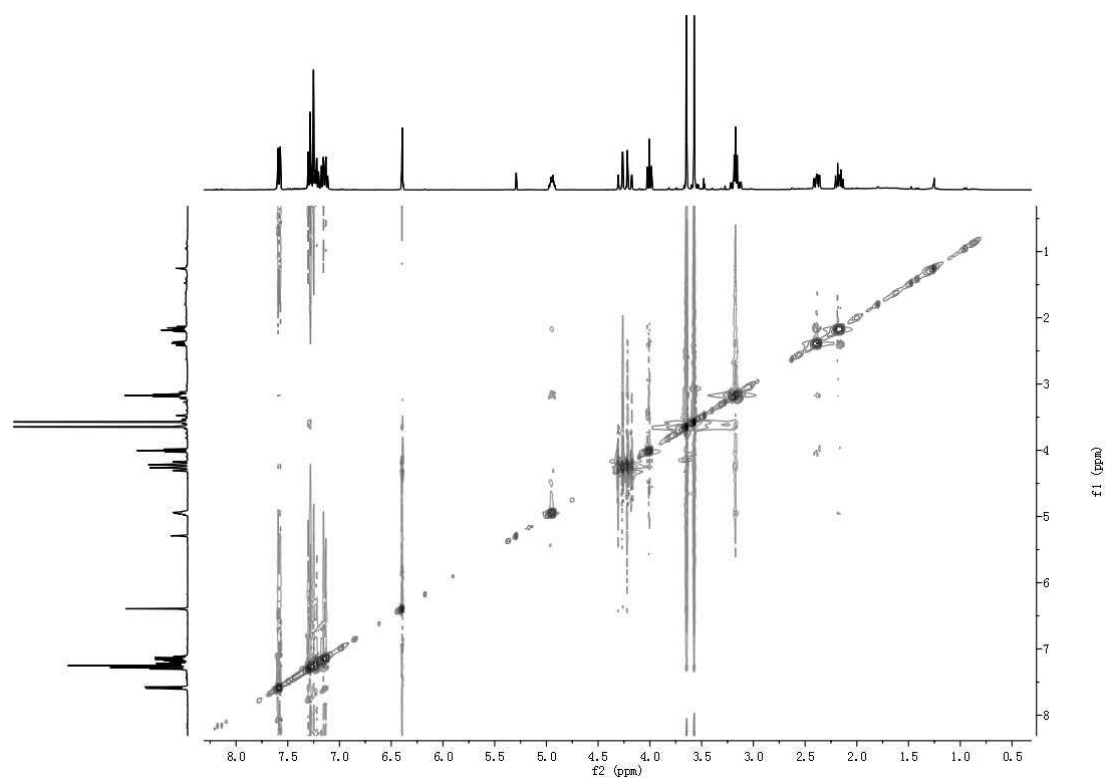

**Figure S20.** NOESY spectrum of **3**

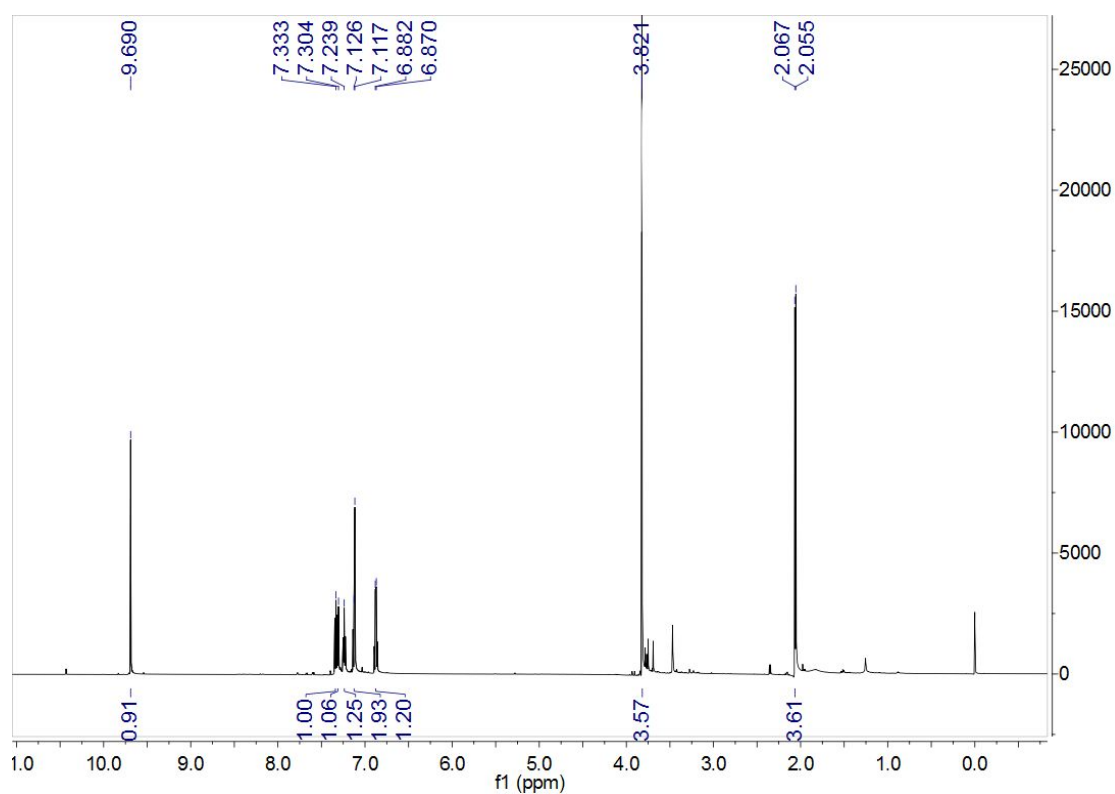

**Figure S21.** <sup>1</sup>H NMR spectrum (400 MHz) of 4

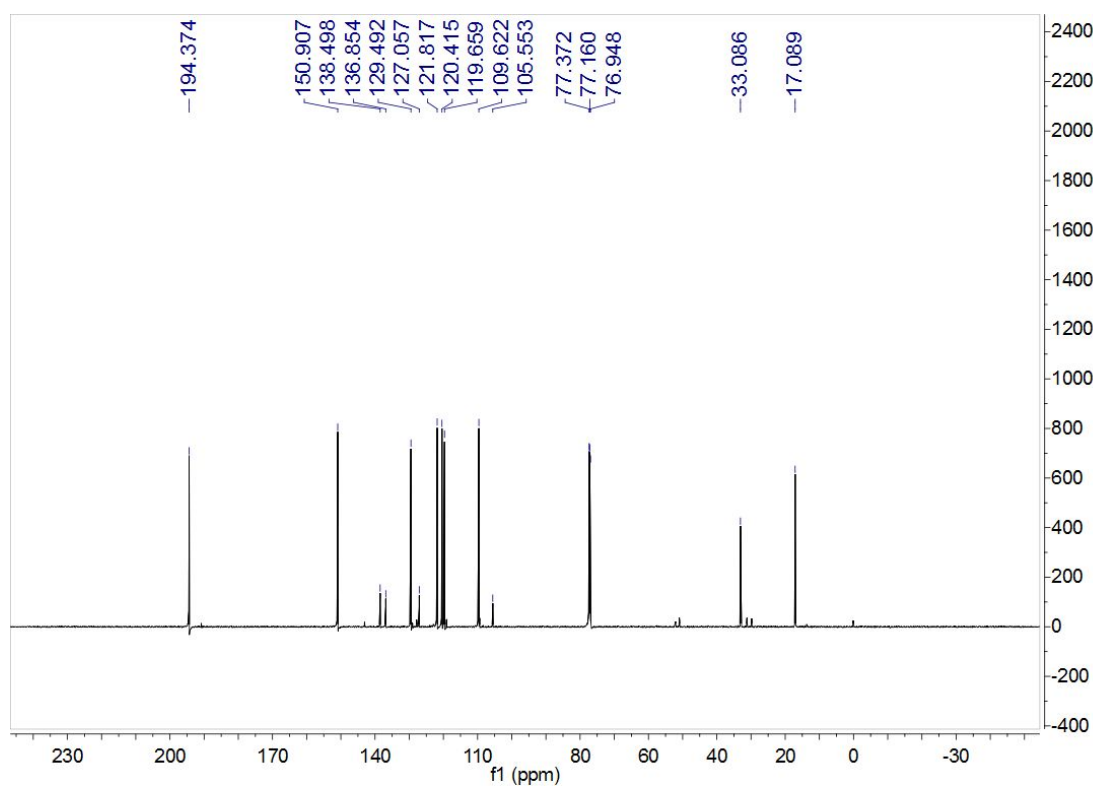

**Figure S22.** <sup>13</sup>C NMR spectrum of 4

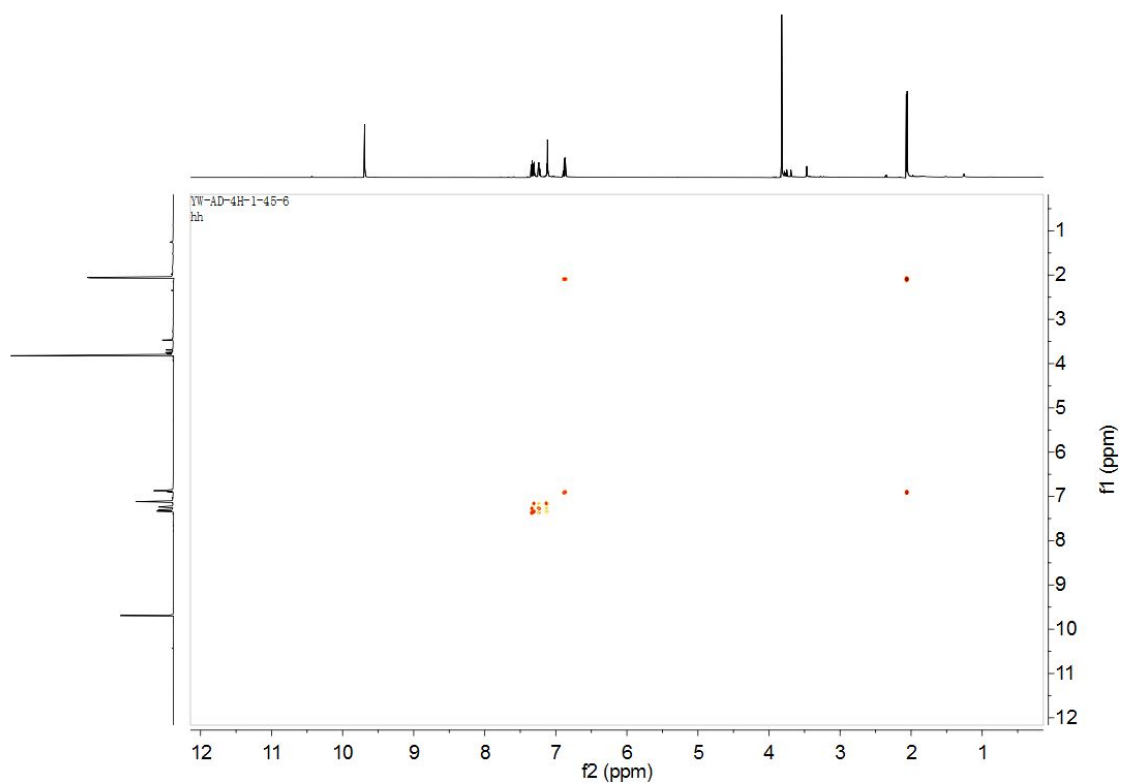

**Figure S23.**  $^1\text{H}$ - $^1\text{H}$  COSY spectrum of 4

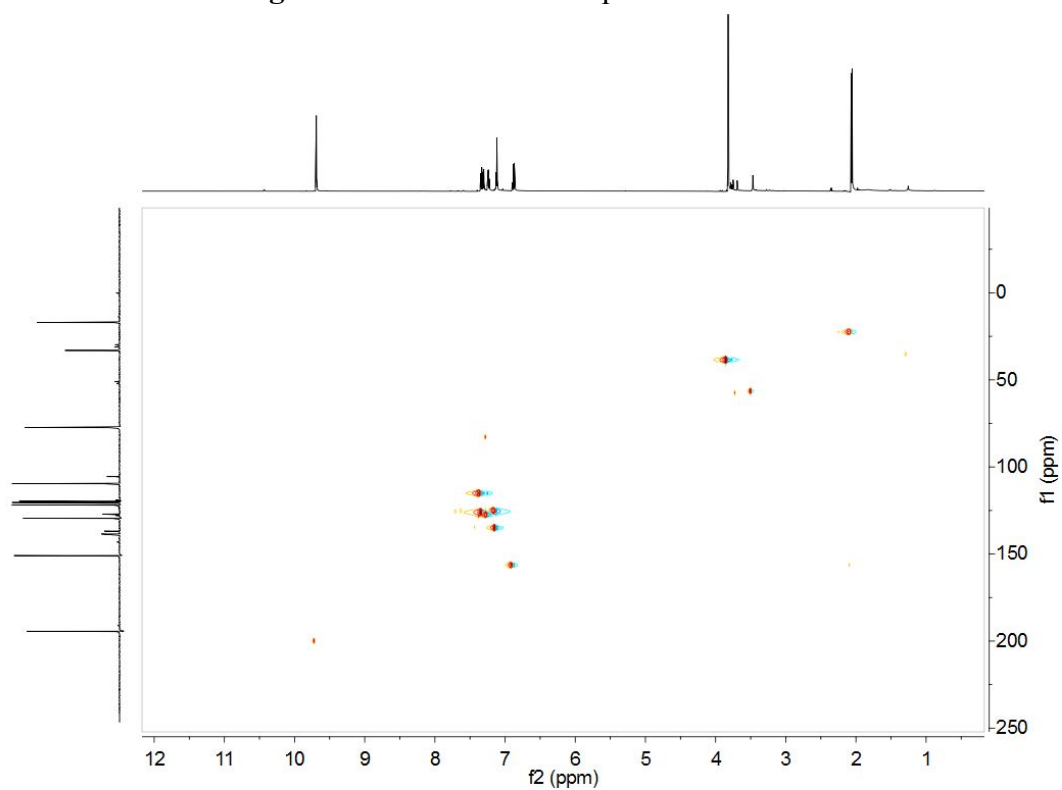

**Figure S24.** HSQC spectrum of 4

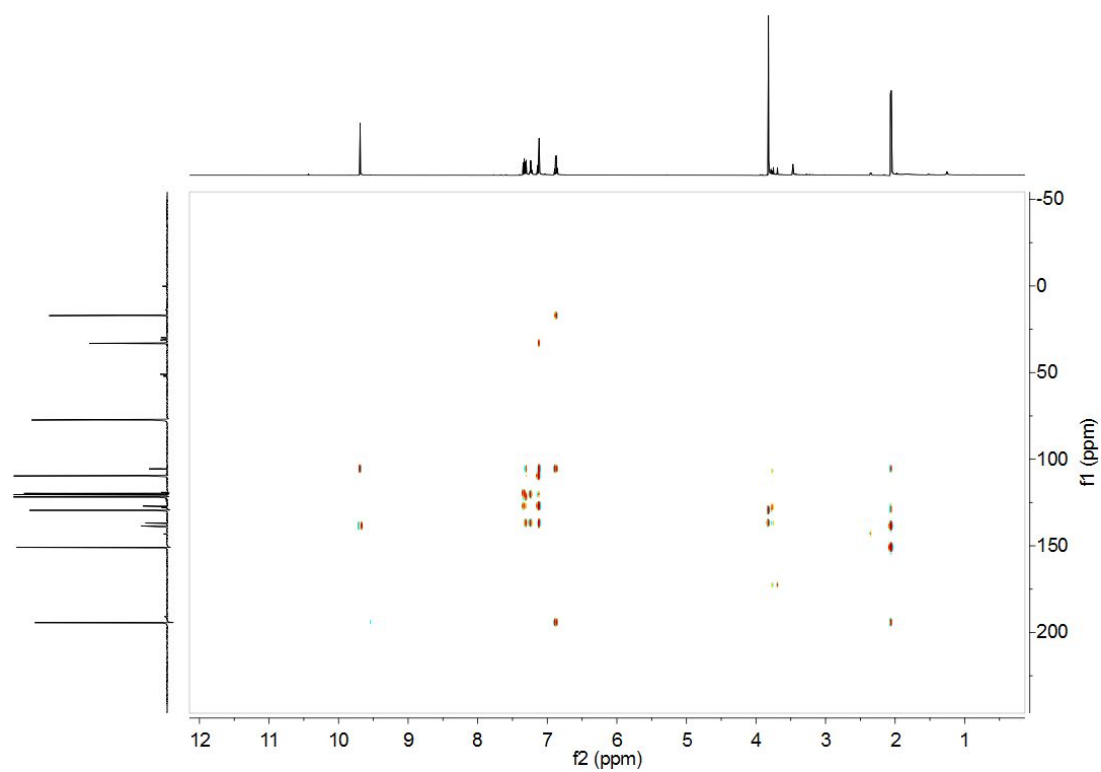

**Figure S25.** HMBC spectrum of **4**

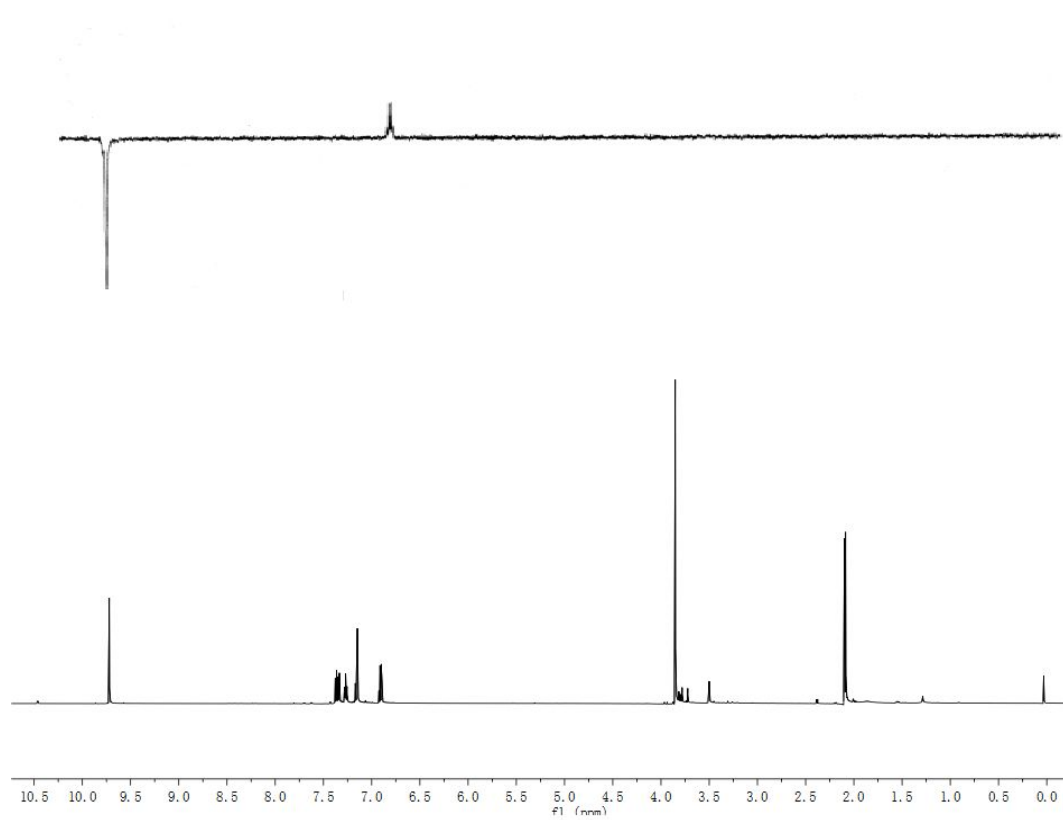

**Figure S26.** NOESY spectrum of **4**

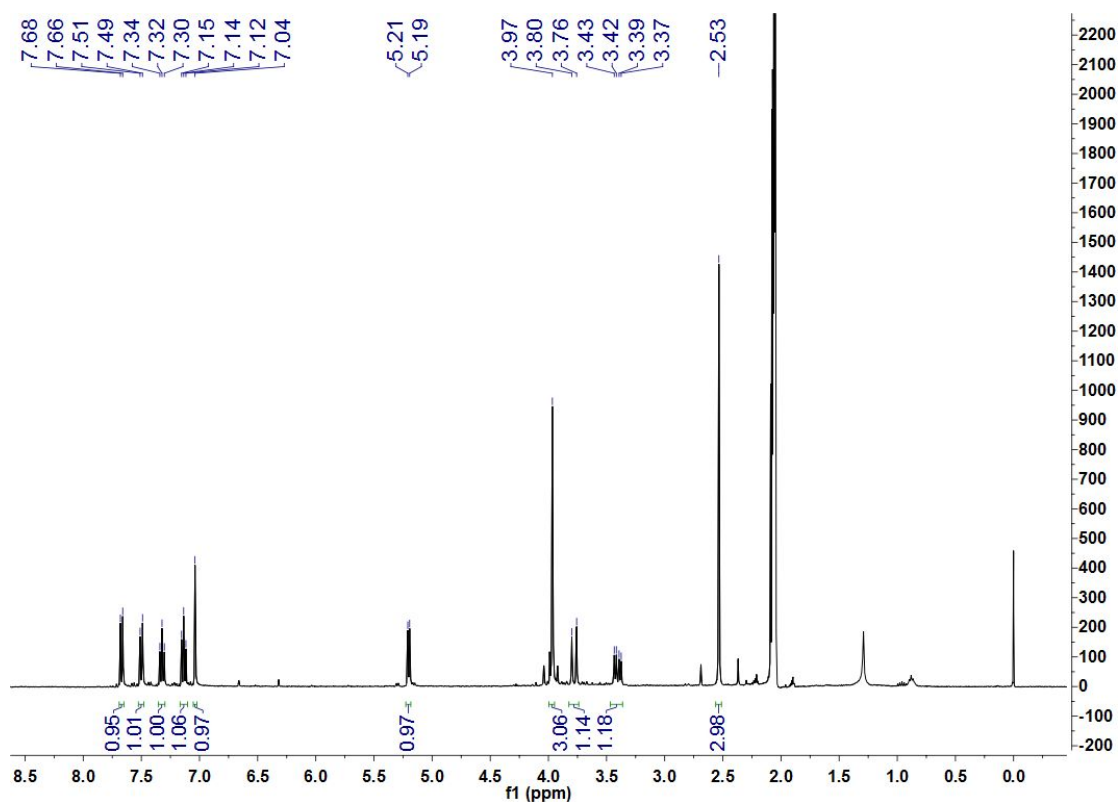

**Figure S27.**  $^1\text{H}$  NMR spectrum (400 MHz) of **5**

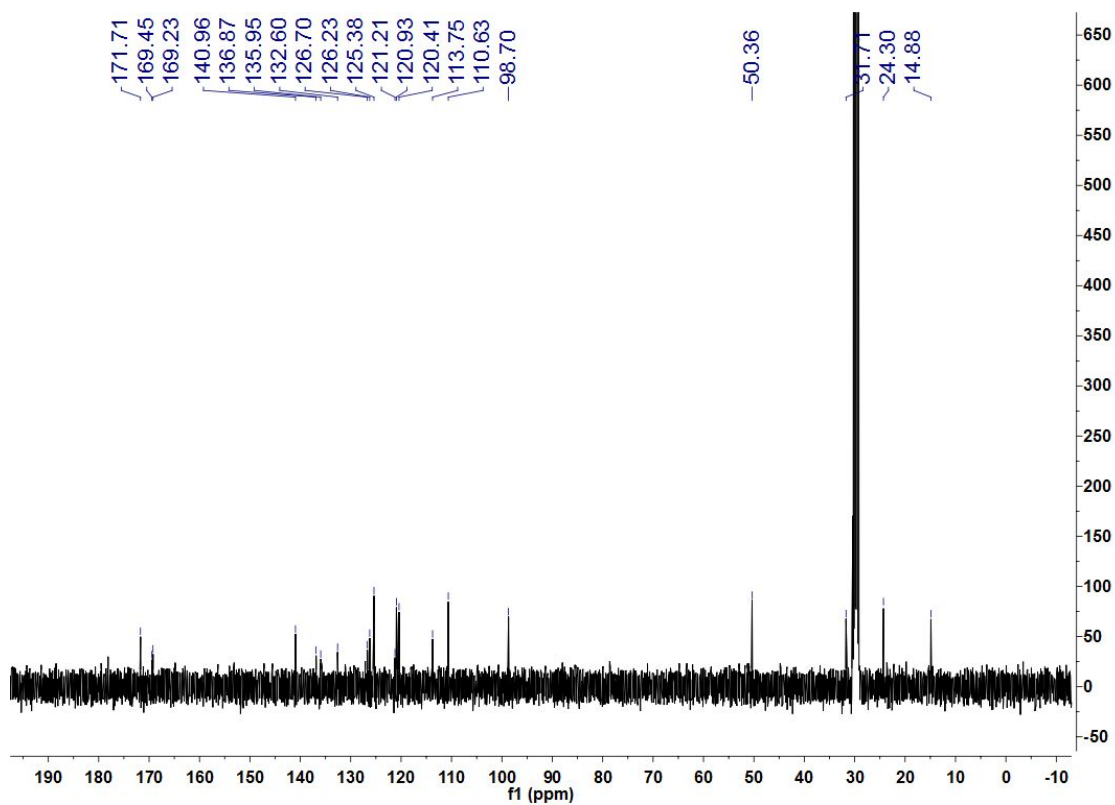

**Figure S28.**  $^{13}\text{C}$  NMR spectrum (100 MHz) of **5**

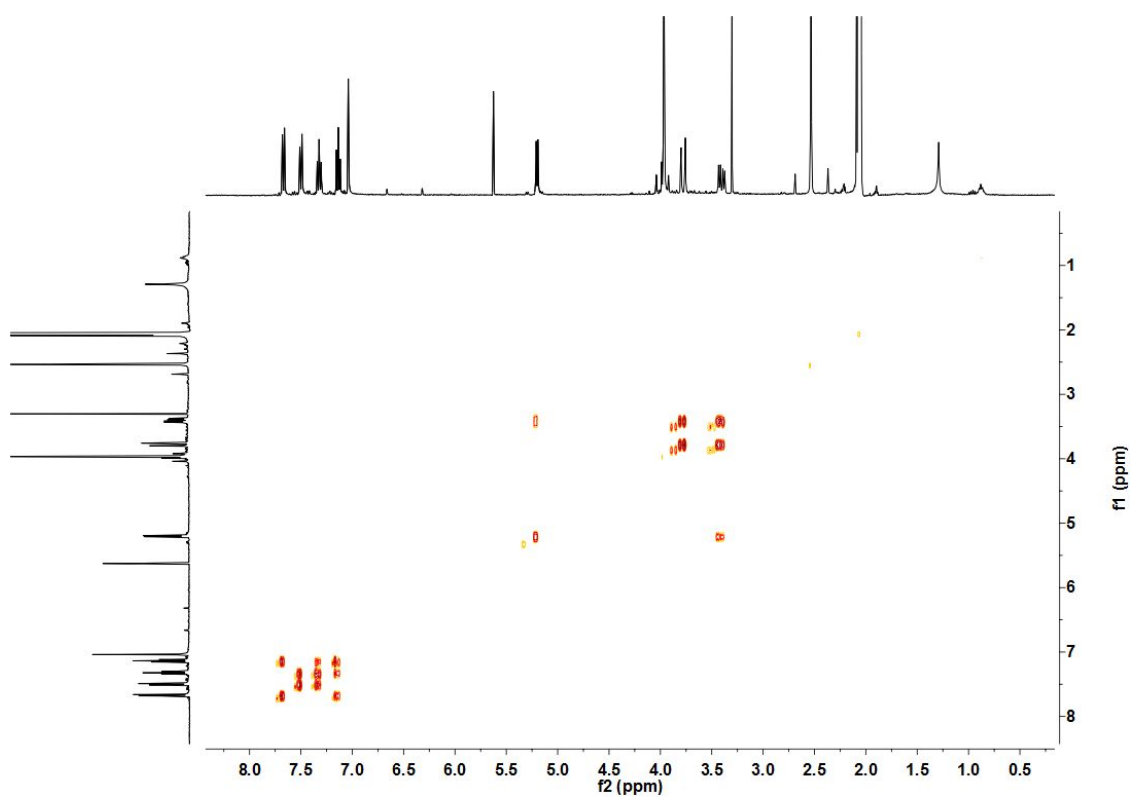

**Figure S29.**  $^1\text{H}$ - $^1\text{H}$  COSY spectrum of **5**

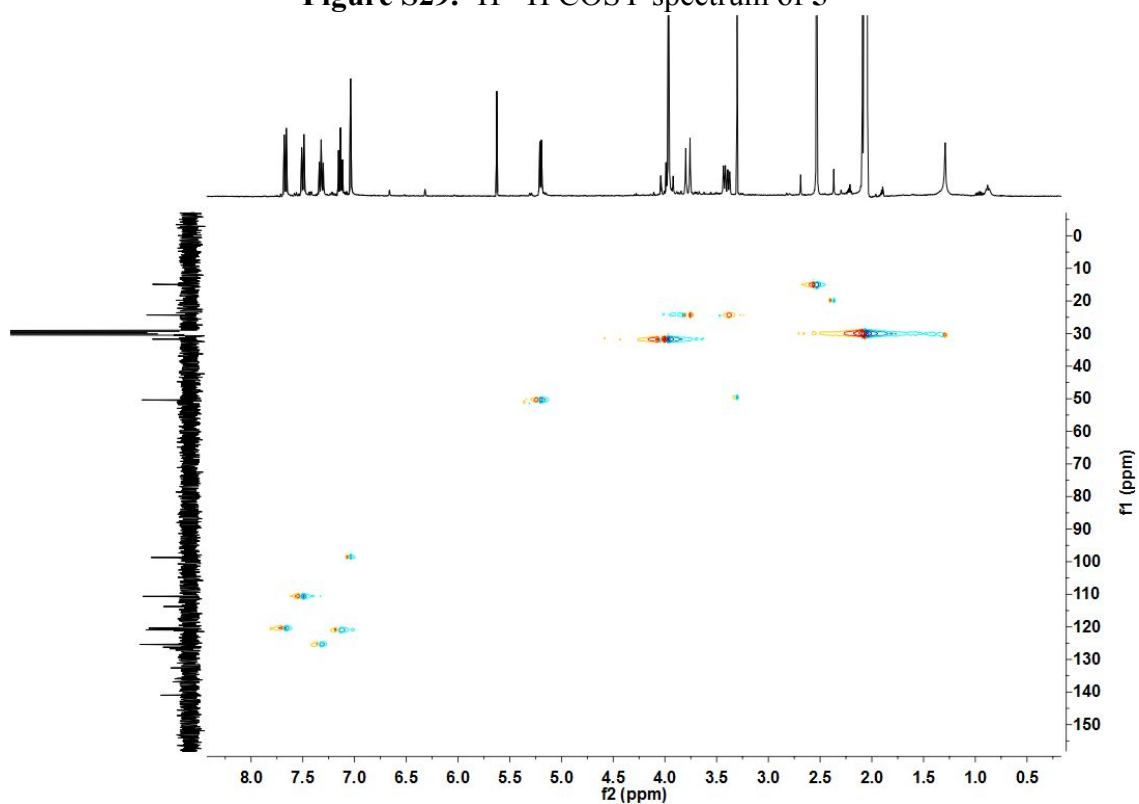

**Figure S30.** HSQC spectrum of **5**

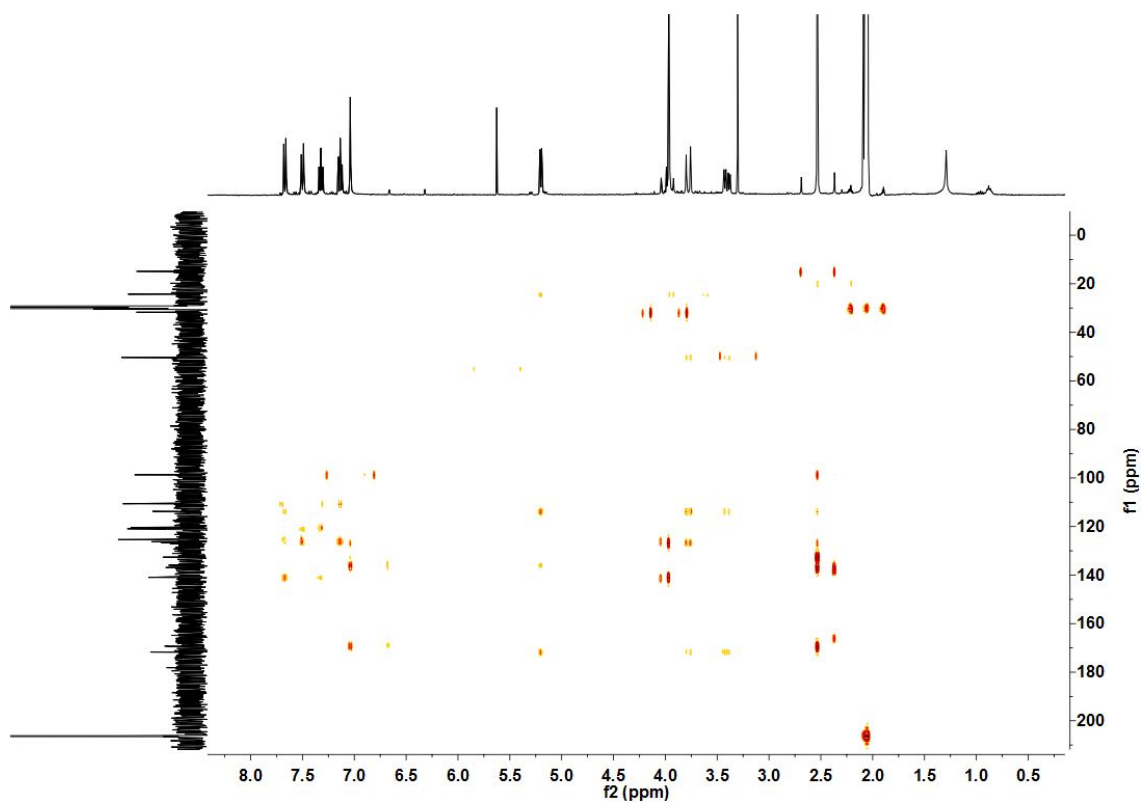

**Figure S31.** HMBC spectrum of **5**

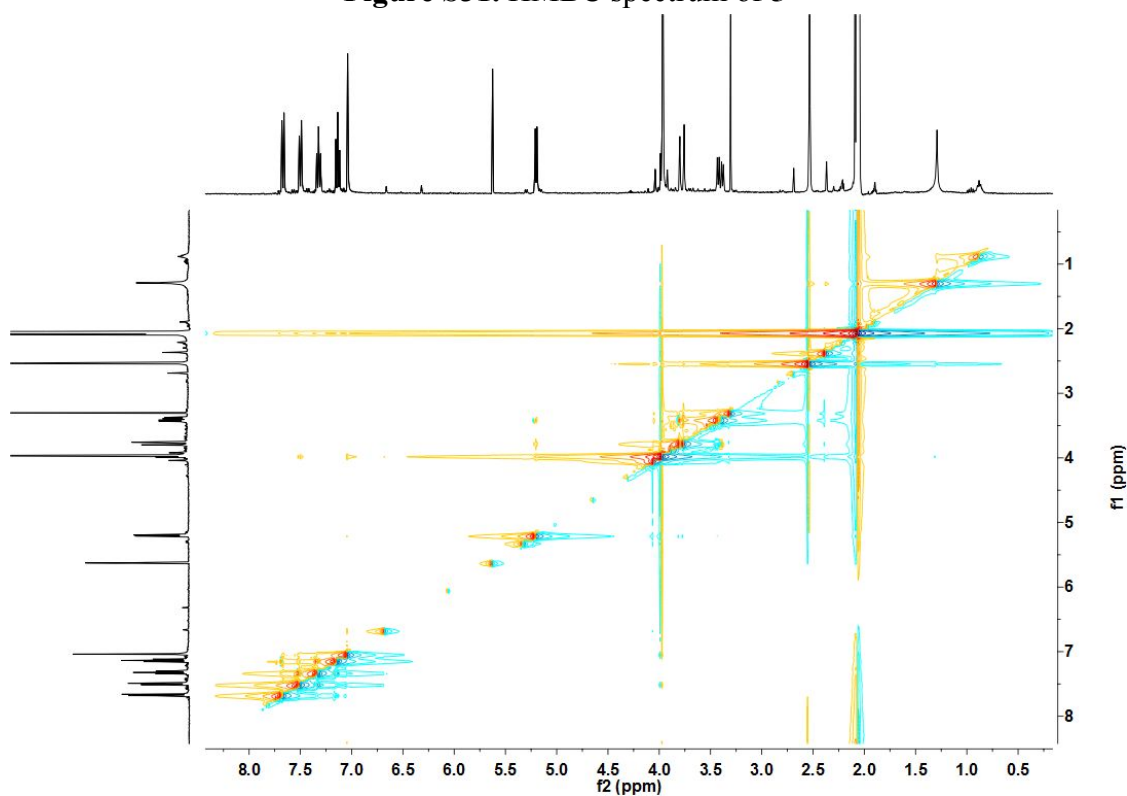

**Figure S32.** NOESY spectrum of **5**

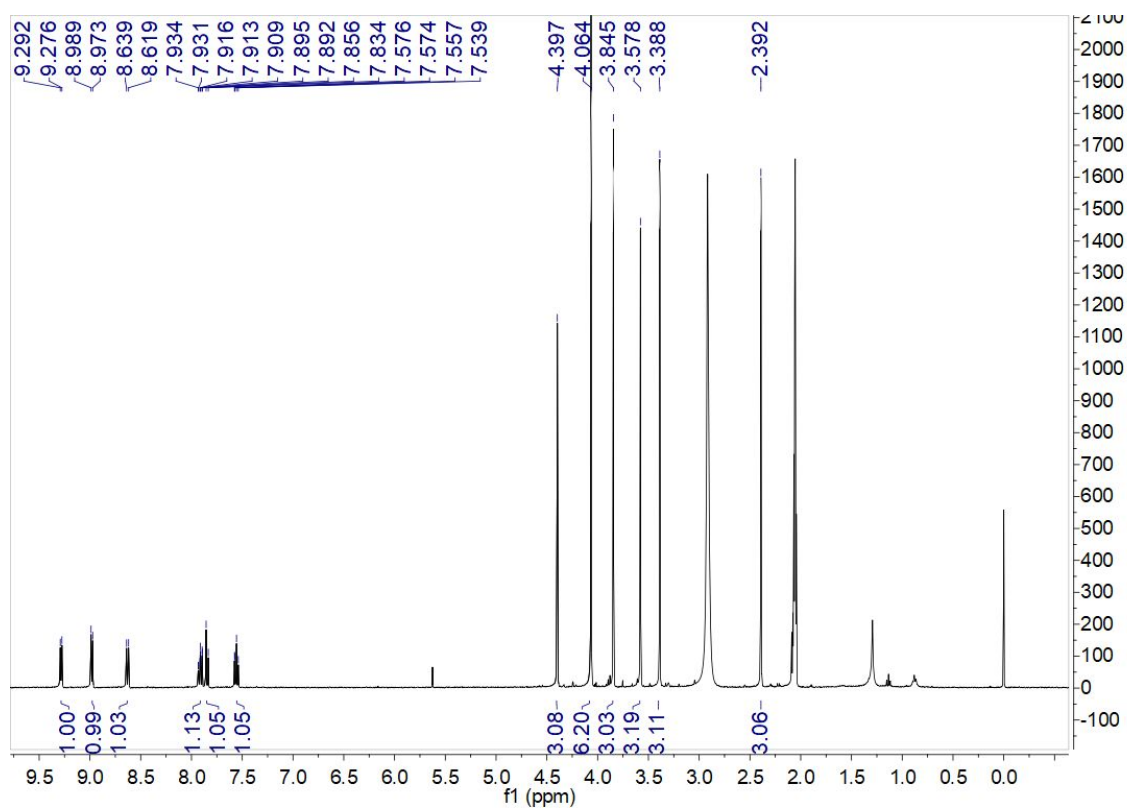

**Figure S33.  $^1\text{H}$  NMR spectrum of 6a**

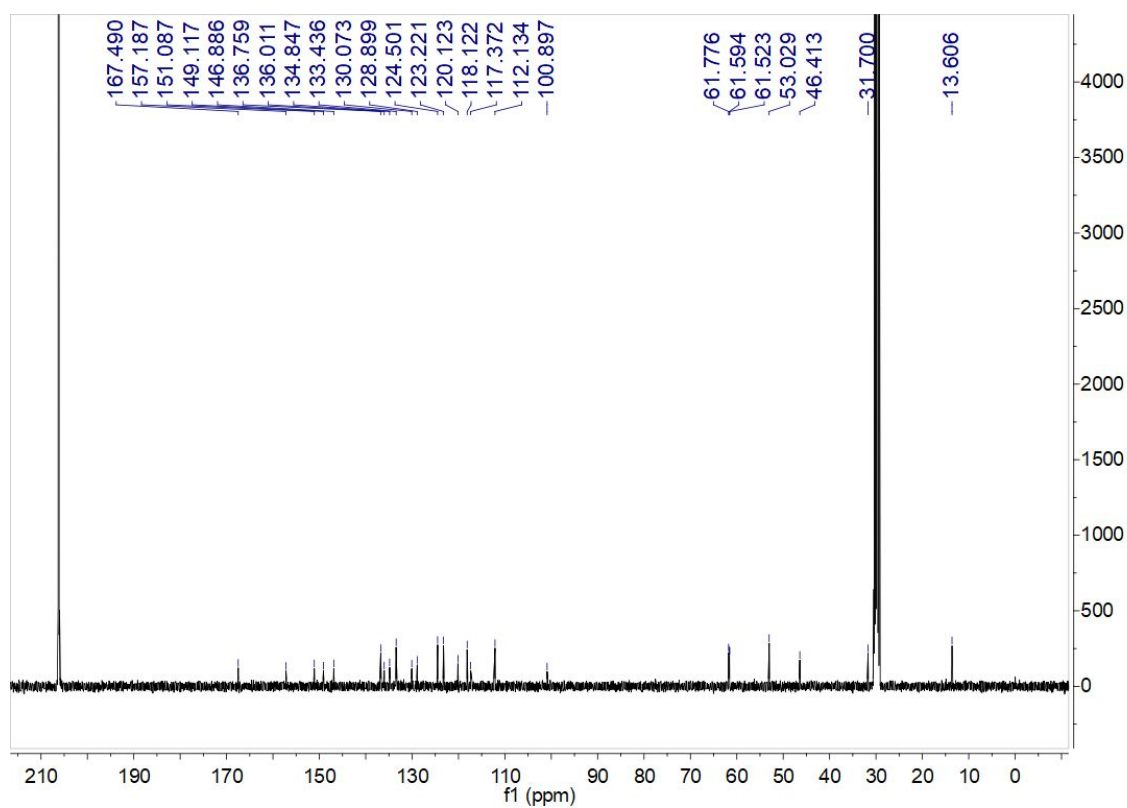

**Figure S34.  $^{13}\text{C}$  NMR spectrum of 6a**

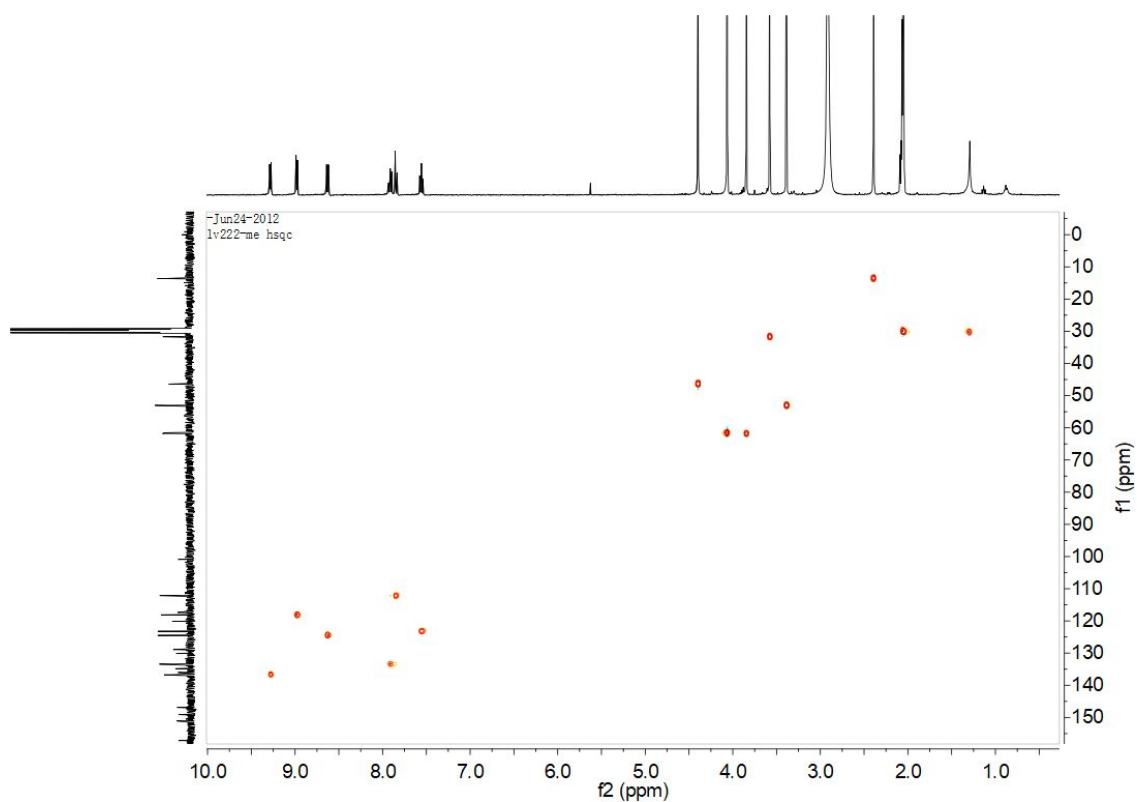

**Figure S35.** HSQC spectrum of **6a**

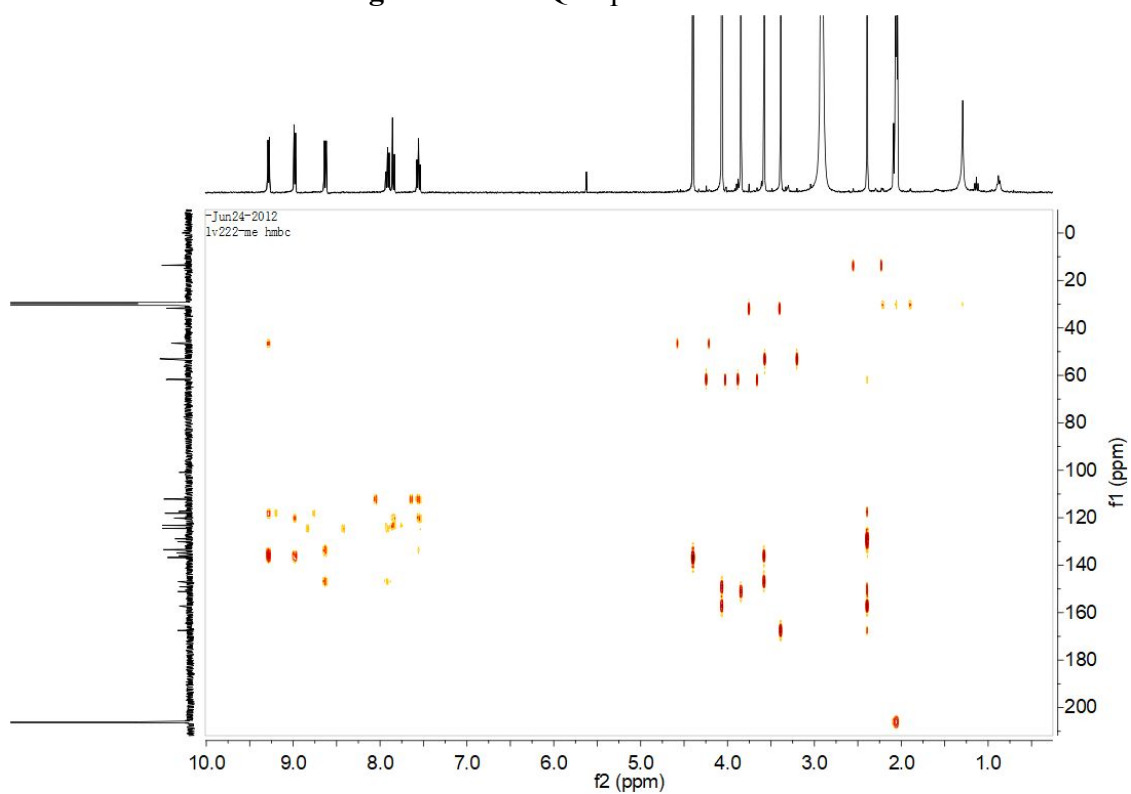

**Figure S36.** HMBC spectrum of **6a**
